# Supplementary material for: Ability of verbal autopsy data to detect deaths due to uncontrolled hyperglycaemia: testing existing methods and development and validation of a novel weighted score
Source: PubMed Central journal article supplement — BMJ Open. 2019 Oct 18;9(10):e026331. doi: 10.1136/bmjopen-2018-026331 (PMC6803086; doi:10.1136/bmjopen-2018-026331), 2019-10-18
Supplement: bmjopen-2018-026331.draft_revisions.pdf [file bmjopen-2018-026331.draft_revisions.pdf]

# BMJ Open

BMJ Open is committed to open peer review. As part of this commitment we make the peer review history of every article we publish publicly available.

When an article is published we post the peer reviewers' comments and the authors' responses online. We also post the versions of the paper that were used during peer review. These are the versions that the peer review comments apply to.

The versions of the paper that follow are the versions that were submitted during the peer review process. They are not the versions of record or the final published versions. They should not be cited or distributed as the published version of this manuscript.

BMJ Open is an open access journal and the full, final, typeset and author-corrected version of record of the manuscript is available on our site with no access controls, subscription charges or pay-per-view fees (<http://bmjopen.bmj.com>).

If you have any questions on BMJ Open's open peer review process please email [info.bmjopen@bmj.com](mailto:info.bmjopen@bmj.com)

# BMJ Open

## Ability of Verbal Autopsy data to detect deaths due to uncontrolled hyperglycaemia; testing existing methods and development and validation of a novel weighted score

|                               |                                                                                                                                                                                                                                                                                                                                                                                                                                                                                                                                              |
|-------------------------------|----------------------------------------------------------------------------------------------------------------------------------------------------------------------------------------------------------------------------------------------------------------------------------------------------------------------------------------------------------------------------------------------------------------------------------------------------------------------------------------------------------------------------------------------|
| Journal:                      | <i>BMJ Open</i>                                                                                                                                                                                                                                                                                                                                                                                                                                                                                                                              |
| Manuscript ID                 | bmjopen-2018-026331                                                                                                                                                                                                                                                                                                                                                                                                                                                                                                                          |
| Article Type:                 | Research                                                                                                                                                                                                                                                                                                                                                                                                                                                                                                                                     |
| Date Submitted by the Author: | 10-Sep-2018                                                                                                                                                                                                                                                                                                                                                                                                                                                                                                                                  |
| Complete List of Authors:     | Blackstock, Sarah; Great Ormond Street Hospital For Children NHS Foundation Trust<br>Witham, Miles ; University of Dundee, School of Medicine; University of the Witwatersrand School of Public Health,<br>Wade, Alisha; university of the Witwatersrand<br>Crampin, Amelia; London School of Hygiene and Tropical Medicine<br>Beran, David; Division of Tropical and Humanitarian Medicine<br>Ogle, Graham; International Diabetes Federation Life for a Child Program<br>Davies, Justine ; King's College London, Centre for Global Health |
| Keywords:                     | Epidemiology < TROPICAL MEDICINE, DIABETES & ENDOCRINOLOGY,<br>Health informatics < BIOTECHNOLOGY & BIOINFORMATICS                                                                                                                                                                                                                                                                                                                                                                                                                           |
|                               |                                                                                                                                                                                                                                                                                                                                                                                                                                                                                                                                              |

SCHOLARONE™  
Manuscripts

1  
2  
3  
4  
5 **Ability of Verbal Autopsy data to detect deaths due to uncontrolled hyperglycaemia; testing existing methods and development and validation of a**  
6 **novel weighted score**  
7

8  
9 Sarah Blackstock, Miles Witham, Alisha N. Wade, Amelia Crampin, David Beran, Graham Ogle, Justine I Davies \*

10  
11 \* Justine Davies is corresponding author. [Justine.davies@kcl.ac.uk](mailto:Justine.davies@kcl.ac.uk)  
12

13  
14 - Dr Sarah J. Blackstock. Great Ormond Street Hospital, London/ London School of Hygiene and Tropical Medicine  
15

16  
17 - Prof Miles Witham. AGE Research Group, Institute for Neuroscience and NIHR Newcastle Biomedical Research Centre, Newcastle University and Newcastle  
18 Upon Tyne Hospitals NHS Foundation Trust, Newcastle, UK.; MRC/Wits Rural Public Health and Health Transitions Research Unit, School of Public Health,  
19 University of the Witwatersrand  
20  
21

22  
23 - Dr. Alisha N. Wade. MRC/Wits Rural Public Health and Health Transitions Research Unit, School of Public Health, University of the Witwatersrand  
24

25  
26 - Prof Mia Crampin. Malawi Epidemiology and Intervention Research Unit (MEIRU), Lilongwe, Malawi; London School of Hygiene and Tropical Medicine,  
27 London, UK  
28

29  
30 - David Beran. Division of Tropical and Humanitarian Medicine, University of Geneva and Geneva University Hospitals  
31  
32

33  
34 - Dr. Graham D. Ogle. International Diabetes Federation Life for a Child Program, Glebe, NSW, Australia  
35  
36 Diabetes NSW & ACT, Glebe, NSW, Australia  
37  
38

1  
2  
3  
4  
5  
6  
7  
8 - Prof Justine Davies. [Justine.davies@kcl.ac.uk](mailto:Justine.davies@kcl.ac.uk). Institute of Applied Health Research. Birmingham University, UK; Centre for Global Health, King's College  
9 London, London, UK; MRC/Wits Rural Public Health and Health Transitions Research Unit, School of Public Health, University of the Witwatersrand.  
10  
11

### 12 13 Contributors

14 JD conceived of the idea. All authors inputted into the development of the idea. MW, JD, and SB did the analyses. SB, AW, and MC reviewed VA data. All  
15 authors contributed to writing and approving the manuscript.  
16  
17

### 18 19 Acknowledgements

20 We acknowledge Osman Sankoh director of the INDEPTH network, and Kathy Kahn and Steve Tollman Directors of the MRC/Wits Rural Public Health and  
21 Health Transitions Research Unit for their support with this project.  
22  
23  
24  
25  
26  
27  
28  
29  
30  
31  
32  
33  
34  
35  
36  
37  
38  
39  
40  
41  
42  
43  
44  
45  
46  
47

## Abstract

### Objectives

Verbal autopsy (VA) is a useful tool to ascertain cause of death where no other mechanisms exist. We aimed to assess the utility of VA data to ascertain deaths due to uncontrolled hyperglycaemia and to develop a weighted score (WS) to specifically identify cases. Cases were identified by a study (study physician classified cases [SPCC]) or site physician (site physician classified cases [SiPCC]) with training in diabetes. These diagnoses were also compared with diagnoses produced by a standard computer algorithm (InterVA-4) (computer algorithm classified cases [CACC]).

### Setting

This study was done using VA data from the Health and Demographic Survey sites in Agincourt, in Rural South Africa. Validation of the WS was done using VA data from Karonga in Malawi

### Participants

All deaths from ages 1-49 years between 1992 and 2015 and 2002-2016 from Agincourt and Karonga, respectively. There were 8699 relevant deaths in Agincourt and 1663 from Karonga.

### Results

Of the Agincourt deaths, there were 77 SPCC and 58 CACC. Agreement between SPCC and CACC was poor (Cohen's kappa 0.14). Our weighted score produced a receiver operator curve with AUC of 0.952 (95% CI 0.920-0.985). However, positive predictive value (PPV) was below 50% when the WS was applied to the development set and the score was dominated by the necessity for a pre-mortem diagnosis of diabetes. Independent validation showed the WS performed reasonably against SiPCC with sensitivity of 86%, specificity of 99%, PPV of 60% and negative predictive value of 99%.

## Conclusion

Our results suggest that widely used VA methodologies may be missing deaths due to uncontrolled hyperglycaemia. Our WS may offer improved ability to detect deaths due to uncontrolled hyperglycaemia in large populations studies where no other means exist.

## Article Summary

### Strengths and limitations of the study:

- It is possible for physicians to interpret verbal autopsy data to ascertain cases premature mortality due to uncontrolled hyperglycaemia of with reasonable inter-rater reliability
- A simple, validated, algorithm can be used to find cases of uncontrolled hyperglycaemia using VA data
- Methods can only be used where verbal autopsy systems exist
- There was no gold standard laboratory diagnosis to confirm our findings

1  
2  
3  
4  
5  
6  
7  
8  
9  
10  
11  
12  
13  
14  
15  
16  
17  
18  
19  
20  
21  
22  
23  
24  
25  
26  
27  
28  
29  
30  
31  
32  
33  
34  
35  
36  
37  
38  
39  
40  
41  
42  
43  
44  
45  
46  
47

## Introduction

Hyperglycaemic emergencies, namely diabetic ketoacidosis and hyperglycaemic hyperosmolar state (HHS) are preventable causes of premature mortality. Both of these conditions occur in individuals with uncontrolled diabetes mellitus and are usually precipitated by intercurrent illness (1). While DKA is classically seen in patients with type 1 diabetes and has inadequate insulin therapy as a frequent precipitant and HHS is classically seen in type 2 diabetes, either of these hyperglycaemic emergencies may be seen in either type of diabetes (1). DKA is the leading cause of mortality in younger people with type 1 diabetes (2) and mortality from HHS ranges from 10-20% (3).

Mortality from hyperglycaemic emergencies has decreased significantly in high income countries (1, 4), largely due to improved diagnosis and treatment of these conditions. By contrast, deaths from these acute complications of uncontrolled hyperglycaemia remain high in lower and middle-income countries (LMICs) (5-8). While delays in presenting to health facilities undoubtedly contribute, deaths from hyperglycaemic emergencies are an indicator of an unmet need for diabetes care. Long term glycaemic control as well as rapid diagnosis and treatment of decompensated diabetes would significantly reduce mortality from these conditions.

Little data exist on the mortality rates in hyperglycaemic emergencies in LMICs and the data that do exist have often been obtained from hospital records (7, 8) and therefore may underestimate true mortality as they do not capture those deaths that occur out of hospital. Verbal autopsy (VA), has been developed to address the deficit of accurate, country-wide, reporting of cause of death in many LMICs (9, 10) and may improve mortality estimates in these conditions.

VA from population samples is a useful tool to ascertain causes of mortality and trends thereof. (11-13) During VA, a respondent – usually a relative - who cared for the deceased during their last illness is asked a set of standard questions about the illness by a trained data collector. (14, 15) VA reports are either reviewed by physicians who assign a cause of death or increasingly, are processed automatically by computer models to derive likely causes of death. Such models (for example InterVA-4) are derived using a mixture of data and expert opinion.(16) They have been shown to be reasonably reliable in

1  
2  
3  
4  
5 determining causes of death which are commonly seen, but data on reliability of these methods for estimating causes of death for less prevalent diseases  
6 are lacking. (11, 16-18)  
7

8  
9  
10 Where there are classic features of an acute death from hyperglycaemia (symptom combinations including diagnosis of diabetes; increased thirst; increased  
11 urine output; coma, etc.) it is relatively straightforward either for a reviewing physician or an automated model like InterVA-4 to arrive at a high likelihood  
12 of diabetes as a cause of death. However, for many people living with diabetes, the symptoms occurring around the time of death may be less obvious,  
13 especially in contexts where symptoms of hyperglycaemia can be attributable to other, more common conditions. In these cases, increased index of  
14 reviewing physician suspicion, for example due to greater exposure-to or knowledge-of the disease, may improve detection of the condition.  
15  
16  
17  
18

19 We therefore aimed to assess ability of the VA methodology, using inter-VA4 algorithm determined cause of death, to detect deaths attributable to  
20 uncontrolled hyperglycaemia, as compared with diagnoses made by a study physician with experience of diabetes care in a LMIC setting. A further aim was  
21 to derive and test a weighted score (WS) – which could later be applied to other settings using VA reports – for detecting deaths due to uncontrolled  
22 hyperglycaemia and validate this WS in VA data from an independent dataset. Other aims were to compare our weighted-score and the study-physician  
23 diagnoses. We limited our age range to between 1 and 49 years of age with an aim of particularly focussing on premature mortality due to uncontrolled  
24 hyperglycaemia.  
25  
26  
27  
28  
29

## 30 **Methods**

### 31 *Setting and VA methodology*

32  
33 Our study was done using VA data from the Agincourt Health and socio-Demographic Surveillance System (HDSS) and validated using data from the Karonga  
34 HDSS in Malawi. (19, 20) The Agincourt HDSS is based in the Agincourt sub-district of rural, northeast South Africa, near the Mozambique border; the  
35 Karonga HDSS is based in the south of Karonga district, in rural northern Malawi. From Agincourt, we used VA data collected on annual census visits  
36 between 1992 and 2015; from Karonga we used VA data collected at household visits initiated after reporting of a death by a community informant at  
37  
38  
39  
40  
41  
42  
43  
44  
45  
46  
47



1  
2  
3  
4  
5 monthly reporting session between 2002 and 2016. VA methodology is described in detail elsewhere.(16) In brief, for any death, household members are  
6 approached and asked to take part in an interview based on standard WHO questionnaires and administered by a local, trained, data collector, or medical  
7 assistant. VA questionnaires consist of responses (which are converted to binary for processing with InterVA-4) to a range of questions on signs, symptoms,  
8 and diagnoses during the terminal illness. Some VAs (for example those in Agincourt and Malawi) also have a ‘free text’ section where respondents are able  
9 to freely describe circumstances leading up to the death. In Agincourt, prior to 2010, cause of death was defined by physician review of each VA. After 2010,  
10 all causes of death have been determined using Inter-VA computer algorithms; all VAs have also been retrospectively formatted for input into InterVA-4  
11 with binary variables (presence of symptom or absence/unknown). In Karonga, both physician review and computer models are used; two physicians  
12 review – blind to each other’s coding – and allocate underlying cause of death as well as direct and contributory causes.(20) Where there is discrepancy  
13 between physicians, a third reviewer considers the VA and the responses of the first two physicians and decides on the cause(s) of death to be coded.  
14  
15  
16  
17  
18  
19  
20  
21  
22  
23  
24  
25  
26  
27  
28  
29  
30  
31  
32  
33  
34  
35  
36  
37  
38  
39  
40  
41  
42  
43  
44  
45  
46  
47

#### *Participant selection and creation of study-physician coded dataset*

Given the rarity of presenting with uncontrolled hyperglycaemia in infants under 1 year old, the increased likelihood of deaths being due to other competing causes in those of older years, and our focus on premature mortality, we *a priori* agreed to restrict our sample age range to deaths occurring between 1 and 49 years of age, inclusive. To enable later application of the WS to other VA datasets, we aligned our age range selection with the WHO 2012 standard VA age-groups and therefore included those in VA age groups “under 5” (1-4), “child” (5-14), and “adult” (15-49).

Data sets which use clinical data including hospital diagnoses and laboratory results to provide a gold standard cause of death have been developed and enable testing of standard VA methodologies. However, the VA input parameters collected in these data sets are not complete,(12, 21) and although fields of use for diagnosing diabetes – for example polyuria and polydipsia - are present in standard VA questionnaires, they are not captured in these gold standard sets. We therefore created a study-physician coded data set which was to act as our “gold-standard”. A clinician with experience in diabetes management in HIC and LMICs (SB) reviewed all data from VA records at Agincourt. Study physician classified cases (SPCC) were determined using

1  
2  
3  
4  
5 responses to the answers to VA questions and examination of the free text. Cases were defined as those for whom uncontrolled hyperglycaemia would be  
6 acceptable as the main cause of death on a standard death certificate. Any cases where the reviewing physician was unsure were discussed with clinical  
7 colleagues with expertise in adult internal medicine, diabetes and endocrinology (AW, JD, and MW) until consensus was reached.  
8  
9

10  
11 Given the likely rarity of SPCC, we produced an enriched sample of cases for study-physician review by searching the VA database for cases with features  
12 suggestive of uncontrolled hyperglycaemia as individual symptoms, symptom combinations, or terms (chosen to reflect both chronic and acute symptoms  
13 of diabetes), as follows:  
14  
15

- 16 • Ante-mortem (AM) diagnosis of diabetes
- 17 • Polyuria
- 18 • Polydipsia
- 19 • Weight loss combined with polyuria or polydipsia
- 20 • Weight loss combined with polyuria or polydipsia and in combination with acute rapid breathing, abdominal pain, confusion, or coma
- 21 • 'Sugar' or 'diabetes' in the free text search
- 22 • Site-physician review indication of deaths due to diabetes (in Agincourt VA data prior to 2010)

23  
24 Any cases that did not have any of the above features were thought clinically unlikely to have died from uncontrolled hyperglycaemia and were therefore  
25 categorised as deaths from other causes (hereafter termed 'negative cases').  
26  
27

### 28 29 30 31 32 *Comparison of SPCC with CACC*

33 We compared the predictive value of InterVA-4 (with positive cases termed computer algorithm classified cases [CACC]) against SPCC in the Agincourt  
34 dataset using Chi Squared and used Cohen's kappa as a measure of inter-rater correlation, with the recognition that the 'raters' in this context included  
35 algorithms. As there is no InterVA-4 category of cause of death due to hyperglycaemia, CACC were defined as determined by Inter-VA-4 as being greater  
36 than 50% likely to be due to diabetes.  
37  
38  
39  
40  
41  
42

### *Development of predictive score*

After producing a set of SPCC and negative cases, we tested the predictive value of VA-recorded variables. These variables were chosen after consensus was reached by study clinicians on which were likely to be seen in uncontrolled hyperglycaemia in clinical practice (as either subacute/chronic features ). (22) Additionally, we identified symptom variables which we thought would reduce likelihood of a death being due to uncontrolled hyperglycaemia and which were captured by the VA questions. We performed univariable testing of each individual above defined symptoms for its ability to predict SPCC using the chi squared test. Symptoms which were significant univariable predictors at  $p < 0.1$  (Pearson's chi squared) were entered into a multivariable binary logistic regression model using stepwise entry. A weighted score was then developed based on the relative beta-weights in the final multivariable model.

We constructed a receiver-operator characteristic (ROC) curve based on the relationship between the weighted score for each individual VA entry and SPCC. We then determined the sensitivity, specificity, positive, and negative predictive values (PPV and NPV) of the weighted score at various cut points.

### *Score validation*

We used VA data from Karonga HDSS in Malawi to externally validate our weighted score. Cases above a cut-point determined based on analysis of Agincourt data were extracted for review and these 'weighted-score classified cases' (WSCC) were compared with Karonga site-physician classified cases (SiPCC).

In addition, and to allow for differences between Karonga site-physician diagnosis and one made by a physician with expertise in diabetes and experience in working in a LMIC setting, in a sample of 100 cases we compared WSCC with classification by an independent endocrinologist (AW; who determined independent physician classified cases [IPCC]). These 100 cases were made up of all WSCC plus a random selection of cases not determined to be deaths due to uncontrolled hyperglycaemia [by the WS or site-physician].

1  
2  
3  
4  
5 We compared CACC and SPCC with WSCC in the Agincourt dataset using Chi Squared. We also describe the predictive value of symptoms identified by  
6 multivariable analysis in determining CACC.  
7

#### 8 9 10 *Determining timing of diagnosis of diabetes*

11 For SPCC or WSCC, we ascertained which cases had been diagnosed with diabetes prior to or during the final illness by examining responses to the VA  
12 question, “did the deceased have diabetes” and examining the VA free texts. Cases where it was stated in the free text that diagnoses of diabetes were  
13 given, or patients were told their sugar levels were high in the final illness, with no noted prior history of diabetes on VA question response were assumed  
14 to have been diagnosed in the final illness. We assumed that diabetes was diagnosed prior to the final illness in cases where it was stated in the free text  
15 that patients were known to have diabetes. Cases where there was no mention of diabetes in the free text were classified as unknown.  
16  
17  
18  
19

#### 20 21 Statistical analysis

22 SPSS v22 (IBM, New York, USA) was used for all analyses. We used Cohen’s kappa to determine inter-rater agreement.  
23  
24

#### 25 Patient and public involvement

26 No patients were involved in this study  
27  
28  
29

#### 30 Ethical approval

31 Ethical approval for this study was given by The London School of Tropical Medicine and Hygiene’s Ethical Review Board. Permission to use VA data in  
32 secondary analyses has been given by the University of Witwatersrand (for Agincourt) and Malawi College of Medicine Ethical review Board.  
33  
34  
35

36 The study and manuscript write up was conducted in accordance with the TRIPOD guidelines.  
37  
38  
39  
40  
41  
42  
43  
44

## Results

### *Determining SPCC*

There were 15,261 deaths occurring in the Agincourt HDSSs which had a VA report completed between 1992 and 2015, of which 8699 were between the ages of 1-49 years. After limiting cases to those with symptoms suggestive of uncontrolled hyperglycaemia, there were 3708 cases which were reviewed by the study-physician. There were two cases with missing data. Of all VA reports reviewed, 77 cases were determined as positive (SPCC), 3626 were negative, and 3 were deemed indeterminate even after discussion amongst investigators. Figure 1 shows the flow of classification of VA cases at Agincourt into SPCC and negative cases.

### *Comparison of SPCC with CACC*

There were 58 CACC. Chi squared testing showed that there was dependence between SPCC and CACC (Pearson chi-squared of 176, 1 degree of freedom,  $p < 0.001$ ), however although they were associated on the chi-squared test (appendix table 1), kappa showed poor concordance, with the VA algorithm not finding the majority of cases identified by the physician; Cohen's Kappa for inter-rater agreement was low at 0.14.

### *Development of the weighted score*

On discussion between investigators, we identified ante-mortem diagnosis of diabetes, polyuria, polydipsia, sunken eyes, weight loss, wasting, acute rapid breathing, abdominal pain or acute abdominal pain (which are two separate responses on VA), coma, and confusion as being variables collected on VA which were likely to be seen in cases of deaths due to uncontrolled hyperglycaemia. In environments where tuberculosis and other respiratory conditions are common causes of death, we did not consider that other symptoms of breathlessness captured on VA were likely to be discriminating enough for our purposes. Of our potential predictive variables, the nine which were significantly associated with SPCC on univariable testing – and thus entered into the multivariable regression analysis - were ante-mortem diagnosis of diabetes ( $p < 0.001$ ), polyuria ( $p = 0.001$ ), polydipsia ( $P < 0.001$ ), confusion ( $p < 0.001$ ), weight loss ( $p = 0.001$ ), chronic abdominal pain ( $p < 0.001$ ), abdominal pain ( $p < 0.001$ ), acute rapid breathing ( $p = 0.095$ ), and wasting ( $p = 0.098$ ) (appendix table 2).

1  
2  
3  
4  
5 We identified 27 variables which were captured on the VA questions which were considered to decrease the clinical likelihood of the death being due to  
6 uncontrolled hyperglycaemia, these were HIV, TB, chronic cough, cough, productive cough, bloody cough, TB combined with chronic cough, chronic fever,  
7 whooping cough, wheeze, night sweats, chronic diarrhoea, bloody diarrhoea, jaundice, hematemesis, hematuria, abdominal mass, swollen abdomen,  
8 swollen legs, injury, died in labour, died 24 hours after labour, vaginal bleeding after menopause, kidney disease, liver disease, cancer, or measles. Of these  
9 variables, on univariable testing, we found injury ( $p=0.021$ ), TB combined with chronic cough ( $p=0.097$ ) night sweats ( $0.032$ ) and chronic diarrhoea ( $0.032$ )  
10 were significant negative predictors of positive cases. Haematuria ( $p=0.06$ ), and measles ( $p=0.002$ ) were significant predictors of SPCC (table1). The positive  
11 association between cases and measles lacked face validity. However, haematuria could be a misunderstanding of urinary frequency also seen in  
12 uncontrolled hyperglycaemia. We therefore entered TB combined with chronic cough, chronic diarrhoea, injury, night sweats, and haematuria into the  
13 multivariable regression analysis.  
14  
15  
16  
17  
18  
19  
20

21 The weighted score was produced using variables which were significantly associated with SPCC on binary logistic regression analysis, scaled to the lowest  
22 positive beta weight and rounded up (or down) to the nearest whole number (table 1). This produced a ROC (figure 2) with an area under the curve (AUC)  
23 of 0.952 (95% CI 0.920-0.985). Sensitivity, specificity, negative predictive value, and positive predictive values of various cut-points for the weighted-score  
24 applied to the Agincourt dataset and compared with study-physician cases are shown in Table 2.  
25  
26  
27  
28

29 We chose a cut-point of 8 to identify cases with reasonable specificity whilst maintaining sensitivity. Applying this cut-point in the Agincourt dataset gave  
30 134 WSCC, thus 1.54% (134/8699) of all deaths were estimated due to uncontrolled hyperglycaemia. Characteristics of these deaths are shown in table 3. In  
31 particular, all had an antemortem diagnosis of diabetes recorded, 62 cases had diabetes diagnosed in the final illness and 24 cases had symptoms on the  
32 free text which were determined to be suggestive of uncontrolled hyperglycaemia. Of note, 138 of all VA deaths in the age range of interest from Agincourt  
33 had an antemortem diagnosis of diabetes – four more than those detected by the algorithm.  
34  
35  
36  
37

38 *Comparison of WSCC with CACC*  
39  
40  
41  
42  
43  
44  
45  
46  
47

Appendix table 1 shows the performance of our weighted score in comparison to InterVA-4. Chi squared showed dependence (pearson chi squared of 146, 1 degree of freedom,  $p < 0.001$ ), however, inter-rater agreement was poor (Cohen's kappa).

#### *Validation of the WS*

We validated our WS using VA data from Karonga in Malawi. There were 3614 VA reports between 2001 and 2016; 1663 of these were from people between 1 and 49 years old. Application of our WS to Karonga VA data and use of a cut-point of 8 or above, identified 20 cases of deaths due to uncontrolled hyperglycaemia (table 3). Comparison of these 20 WSCC with SiPCC (as either the underlying or contributory cause) showed 12 WSCC which were true positives; the Karonga site-physician also identified an additional two case of deaths from diabetes which the algorithm did not detect. Thus, giving a sensitivity of 86%, specificity of 99%, PPV of 60% and negative predictive value of 99%.

Of the 20 WSCC, all were in the adult age group; nine between 20-29, five between 30-39, and six between 40-49 years of age. All cases had a pre-mortem diagnosis of diabetes, and we determined that 4 of these diagnoses were made in the final illness (of note 22 deaths in the whole Karonga VA dataset for this age range had pre-mortem diagnosis of diabetes). 10 relatives reported symptoms on the free text that were suggestive of uncontrolled hyperglycaemia, and for 7 of the 20 weighted-score detected cases relatives recalled being told by treating healthcare workers that the death was caused by diabetes (table 3).

Out of the 100 cases assessed, the external investigator-physician (AW) determined that a total of 22 IPCC, 74 deaths not due to uncontrolled hyperglycaemia, and 4 were unclassifiable due to missing data. Compared with the external investigator-physician, the weighted score gave 15 true positives and 7 false negatives. All SiPCC were deemed positive by the independent physician investigator. However, compared to the site-physician, the independent physician investigator determined there were an additional nine deaths likely to be due to uncontrolled hyperglycaemia (kappa for inter-rater agreement = 0.69).

#### *Performance of clinically determined variables in detecting CACC*

1  
2  
3  
4  
5 Variables which we determined were clinically likely to increase or decrease chance of death due to uncontrolled hyperglycaemia were tested for  
6 association with CACC. In univariable testing, we found ante-mortem diagnosis of diabetes ( $p<0.001$ ), polyuria ( $p<0.001$ ) and polydipsia ( $p<0.001$ ) to be  
7 positive predictors these cases. TB and chronic cough ( $p=0.025$ ), wasting ( $p<0.001$ ), sunken eyes ( $p=0.012$ ), chronic diarrhoea ( $p=0.006$ ), chronic cough  
8 ( $p<0.001$ ), chronic fever ( $p=0.003$ ), wheeze ( $p<0.001$ ), productive cough ( $p=0.003$ ), night sweats ( $p<0.001$ ), abdominal swelling ( $p=0.048$ ), and injury  
9 ( $p=0.03$ ) were significant negative predictors of diabetes. Results of multivariable testing are shown in appendix table 3. Appendix table 1 shows the  
10 performance of InterVA-4 in comparison to the study-physician categorization.  
11  
12  
13  
14  
15

## 16 Discussion

17 There are several key findings from our study. The first is that compared with a physician classification of VA data, the widely used InterVA-4 algorithm  
18 performs poorly in detecting cases of deaths thought clinically likely due to uncontrolled hyperglycaemia. Reports from InterVA-4 on numbers of deaths due  
19 to diabetes should therefore be interpreted with caution. Second, we found that a large number of deaths due to uncontrolled hyperglycaemia only  
20 received a diagnosis of diabetes in their final illness, especially in the Agincourt sample. Verbal Autopsy captures data from carers, rather than health  
21 records, and thus this finding may be overly negative. It is nevertheless troubling and suggests that further investigation of health system's ability to  
22 diagnose and manage diabetes is needed. Third, it was possible to develop a weighted-score to detect cases of uncontrolled hyperglycaemia, that, at a  
23 cutpoint of greater than 8, had reasonable sensitivity and specificity. Our weighted score also had better agreement with SPCC than the Inter-VA 4 model.  
24 On validation in an independent data set, the score also showed good sensitivity and specificity for predicting deaths due to uncontrolled hyperglycaemia  
25 both when compared to SiPCC and IPCC. However, the score was dominated by a pre-mortem diagnosis of diabetes and it could be argued that inclusion of  
26 the other factors provided minimal further discriminatory value. Apart from pre-mortem diagnosis of diabetes, the predominant symptoms that our  
27 weighted-score detected were related to uncontrolled hyperglycaemia (polydipsia and polyuria). Our score, or indeed, VA cannot discriminate between  
28 deaths due to hyperglycaemia complications of type 1 or type 2 diabetes. Additionally, given recent evidence from HIC which suggests the fall in incidence  
29 of type 1 diabetes with age may not be as steep as previously thought (23) and, from sub-Saharan Africa, where there is some evidence that the peak age of  
30  
31  
32  
33  
34  
35  
36  
37  
38  
39  
40  
41  
42  
43  
44  
45  
46  
47



1  
2  
3  
4  
5 presentation may be older than in other countries, (24, 25), limiting the age range of cases is unlikely to be a strategy to enable detection of cases of  
6 uncontrolled hyperglycaemia due to type 1 diabetes.  
7

8  
9  
10 As mentioned, we found that ante-mortem recording of a diagnosis of diabetes was the strongest predictor of a death being due to uncontrolled  
11 hyperglycaemia, in fact, using our score cut-point of 8, it is not possible to assign diabetes as a cause of death without diabetes having been recorded on the  
12 VA report. This is a further limitation of our score, making it only applicable in settings where health systems are advanced enough to diagnose diabetes or  
13 report hyperglycaemia; unfortunately, in many LMICs, laboratory services are focused on detecting infectious rather than non-communicable diseases.(26)  
14 This lack of diagnostic capacity also impacts upon the ability of health systems to detect and treat diabetes to prevent untimely deaths. Even in countries  
15 with reasonable diagnostic ability, it may not be deployed early enough in the disease course to avert death.(27, 28) Such delayed diagnosis is reflected in  
16 our finding that diagnosis of diabetes was often made in the final illness, suggesting that the death could have been averted if diagnosis had been made  
17 earlier in the illness. Access to diagnostic testing has to be paired with an increased index of suspicion of the diagnosis early in the disease course. We also  
18 acknowledge that even if diagnoses are made, hurdles of access to treatment still need to be overcome (29, 30).  
19  
20  
21  
22  
23  
24

25 Although we found that our WS performance was substantially more reliable in ascertaining cases of deaths due to uncontrolled hyperglycaemia than  
26 InterVA-4 when applied to Agincourt, our study aim was to look specifically for this condition, and we produced an algorithm that was optimized to find  
27 cases. In contrast, InterVA-4 takes into consideration numerous competing diseases to deliver an adequate performance to determine population-level  
28 causes of death across a wide range of diseases (16) and was not developed to detect single diseases. Furthermore, whilst physicians use both presence and  
29 absence of symptoms to determine diagnoses, InterVA-4 predominately relies upon presence of symptoms. (31) It is also interesting that there were  
30 differences between physicians in ascribing uncontrolled hyperglycaemia as a cause of death. These differences are likely to result from different exposure  
31 to disease prevalence and be influenced by the reason for examining the data; it would be expected that physicians who were used to dealing with a  
32 condition and who were specifically looking for that condition would find a greater prevalence of that condition.(32-34) However, that there was  
33 reasonable agreement between the investigator physician (AW) and the algorithm with the Karonga site physician diagnoses is reassuring.  
34  
35  
36  
37  
38  
39  
40  
41  
42  
43  
44  
45  
46  
47

1  
2  
3  
4  
5  
6  
7 There are several limitations of our study. The lack of a gold standard data set which contained both confirmed clinical diagnosis and relevant VA  
8 parameters necessitated our use of a physician to ascertain cases and without laboratory results, the diagnosis can never be certain. To enrich the data-  
9 set for clinical review with likely cases, we also pre-selected cases that had one or more response on VA which could suggest the diagnosis; although it is  
10 unlikely that deaths with no symptoms of uncontrolled hyperglycaemia noted would have died of this condition, it is not impossible. The enrichment of the  
11 review dataset to with these cases could also have led to overfitting of the WS. Lastly, as in the development of InterVA-4, we, a priori, decided to use  
12 clinical knowledge to guide choice of our input variables of our model. Whilst we argue that this is a reasonable method for model development, an  
13 alternative approach could have been to assess all VA variables for association and include all those that are statistically significant regardless of clinical  
14 validity.  
15  
16  
17  
18  
19

20  
21 In summary, we have found that the InterVA-4 algorithm performs poorly at detecting cases of deaths due to uncontrolled hyperglycaemia. Our algorithm  
22 improves detection, however is dominated by necessity for a pre-mortem diagnosis of diabetes with other variables adding little discrimination. We also  
23 found that a high proportion of deaths due to uncontrolled hyperglycaemia received a diagnosis in their final illness. In countries where information on  
24 numbers of deaths due to uncontrolled hyperglycaemia is lacking and where VA reports exist, our algorithm can be used to give an indication of the  
25 numbers of deaths due to the condition, hence expose health system gaps in the provision of care which would result in earlier diagnosis and treatment.  
26  
27  
28  
29  
30  
31  
32  
33  
34  
35  
36  
37  
38  
39  
40  
41  
42  
43  
44  
45  
46  
47

1  
2  
3  
4  
5  
6  
7  
8  
9  
10  
11  
12  
13  
14  
15  
16  
17  
18  
19  
20  
21  
22  
23  
24  
25  
26  
27  
28  
29  
30  
31  
32  
33  
34  
35  
36  
37  
38  
39  
40  
41  
42  
43  
44  
45  
46  
47

**Table 1: Binary logistic regression showing variables entered into the weighted-score and derived score weights**

|                                   | Number of cases with symptom | beta   | Standard error | p      | Weighting (beta/0.751) | rounded weight |
|-----------------------------------|------------------------------|--------|----------------|--------|------------------------|----------------|
| Ante-mortem diagnosis of diabetes | 140                          | 6.462  | 0.357          | <0.001 | 8.6045273              | 9              |
| Polyuria                          | 265                          | 1.542  | 0.583          | 0.008  | 2.05326232             | 2              |
| Polydipsia                        | 2539                         | 1.406  | 0.353          | <0.001 | 1.87217044             | 2              |
| Confusion                         | 1569                         | 0.751  | 0.352          | 0.033  | 1                      | 1              |
| TB and chronic cough              | 944                          | -1.627 | 0.716          | 0.023  | -2.1664447             | -2             |
| Chronic diarrhoea                 | 992                          | -2.058 | 0.795          | 0.01   | -2.7403462             | -3             |
| Constant                          | -                            | -7.114 | 0.357          | <0.001 | -                      | -              |

**Table 2: Sensitivity and specificity of the weighted score above different score cut-points (summed weightings) as applied to Agincourt data and tested against study-physician classification of cases**

| Cut-point | Number of deaths above cut-point | Sensitivity (%) | Specificity (%) | PPV (%) | NPV (%) |
|-----------|----------------------------------|-----------------|-----------------|---------|---------|
| 5         | 169                              | 83.54           | 98.91           | 39.05   | 99.85   |
| 6         | 138                              | 82.27           | 99.15           | 47.10   | 99.84   |
| 7         | 136                              | 82.28           | 99.17           | 47.79   | 99.84   |
| 8         | 134                              | 82.28           | 99.20           | 48.01   | 99.84   |
| 9         | 133                              | 81.01           | 99.20           | 48.12   | 99.82   |

1  
2  
3  
4  
5  
6  
7  
8  
9  
10  
11  
12  
13  
14  
15  
16  
17  
18  
19  
20  
21  
22  
23  
24  
25  
26  
27  
28  
29  
30  
31  
32  
33  
34  
35  
36  
37  
38  
39  
40  
41  
42  
43  
44  
45  
46  
47

**Table 3: Characteristics of people identified by the study physician and the algorithm as having died of diabetes**

|                                                         | Agincourt | Agincourt          | Karonga            |
|---------------------------------------------------------|-----------|--------------------|--------------------|
|                                                         | SPCC      | WSCC (cutpoint >8) | WSCC (cutpoint >8) |
| Total                                                   | 77        | 134                | 20                 |
| Infant                                                  | 0         | 3                  | 0                  |
| Under 5                                                 | 6         | 6                  | 0                  |
| Child                                                   | 3         | 3                  | 0                  |
| Adult                                                   | 68        | 122                | 20                 |
| Female                                                  | 38        | 71                 | 12                 |
| male                                                    | 39        | 63                 | 8                  |
| Any recorded ante-mortem diagnosis of diabetes          | 64        | 134                | 20                 |
| No ante-mortem diagnosis of diabetes                    | 13        | 0                  | 0                  |
| Ante-mortem diagnosis of diabetes made in final illness | 37        | 62                 | 4                  |

For peer review only

|                                                               |    |    |    |
|---------------------------------------------------------------|----|----|----|
| Ante-mortem diagnosis of diabetes made prior to final illness | 3  | 10 | 10 |
| Unknown when ante-mortem diagnosis of diabetes made           | 24 | 62 | 6  |

#### Competing interests

We have no competing interests to declare

#### Funding

AW is supported by a grant from NIH, there was no other external funding for this study.

#### Data availability

Verbal Autopsy data are accessible through contacting Agincourt or Karonga Health and Demographic Survey sites. Data use agreements apply.

**Fig 1. Study flow chart****Figure 2: ROC curve for weighted score applied to study physician coded dataset**

1. Maletkovic J, Drexler A. Diabetic ketoacidosis and hyperglycemic hyperosmolar state. *Endocrinol Metab Clin North Am*. 2013;42(4):677-95.
2. Umpierrez G, Korytkowski M. Diabetic emergencies - ketoacidosis, hyperglycaemic hyperosmolar state and hypoglycaemia. *Nat Rev Endocrinol*. 2016;12(4):222-32.
3. Pasquel FJ, Umpierrez GE. Hyperosmolar hyperglycemic state: a historic review of the clinical presentation, diagnosis, and treatment. *Diabetes Care*. 2014;37(11):3124-31.
4. Gregg EW, Li Y, Wang J, Burrows NR, Ali MK, Rolka D, et al. Changes in diabetes-related complications in the United States, 1990-2010. *N Engl J Med*. 2014;370(16):1514-23.
5. Anthanont P, Khawcharoenporn T, Tharavanij T. Incidences and outcomes of hyperglycemic crises: a 5-year study in a tertiary care center in Thailand. *J Med Assoc Thai*. 2012;95(8):995-1002.
6. Chung ST, Perue GG, Johnson A, Younger N, Hoo CS, Pascoe RW, et al. Predictors of hyperglycaemic crises and their associated mortality in Jamaica. *Diabetes Res Clin Pract*. 2006;73(2):184-90.
7. Desse TA, Eshetie TC, Gudina EK. Predictors and treatment outcome of hyperglycemic emergencies at Jimma University Specialized Hospital, southwest Ethiopia. *BMC Res Notes*. 2015;8:553.
8. Ekpebegeh CO, Longo-Mbenza B, Akinrinmade A, Blanco-Blanco E, Badri M, Levitt NS. Hyperglycaemic crisis in the Eastern Cape province of South Africa: high mortality and association of hyperosmolar ketoacidosis with a new diagnosis of diabetes. *S Afr Med J*. 2010;100(12):822-6.
9. Colin D, Mathers DMF, Mie Inoue, Chalapati Rao, Alan D. Lopez. Counting the dead and what they died from: an assessment of the global status of cause of death data. *Bulletin of the World Health Organization*. 2005;83:6.
10. Byass P. Who needs cause-of-death data? *PLoS Med*. 2007;4(11):e333.
11. Byass P, Calvert C, Miiro-Nakiyingi J, Lutalo T, Michael D, Crampin A, et al. InterVA-4 as a public health tool for measuring HIV/AIDS mortality: a validation study from five African countries. *Glob Health Action*. 2013;6:22448.
12. Byass P. Usefulness of the Population Health Metrics Research Consortium gold standard verbal autopsy data for general verbal autopsy methods. *Bmc Medicine*. 2014;12.
13. Thomas LM, D'Ambruoso L, Balabanova D. Verbal autopsy in health policy and systems: a literature review. *Bmj Global Health*. 2018;3(2).
14. Leitaio J, Chandramohan D, Byass P, Jakob R, Bundhamcharoen K, Choprapawon C, et al. Revising the WHO verbal autopsy instrument to facilitate routine cause-of-death monitoring. *Glob Health Action*. 2013;6:21518.
15. Nichols EK, Byass P, Chandramohan D, Clark SJ, Flaxman AD, Jakob R, et al. The WHO 2016 verbal autopsy instrument: An international standard suitable for automated analysis by InterVA, InSilicoVA, and Tariff 2.0. *Plos Medicine*. 2018;15(1).
16. Soleman N, Chandramohan D, Shibuya K. Verbal autopsy: current practices and challenges. *Bull World Health Organ*. 2006;84(3):239-45.

17. Herrera S, Enuameh Y, Adjei G, Ae-Ngibise KA, Asante KP, Sankoh O, et al. A systematic review and synthesis of the strengths and limitations of measuring malaria mortality through verbal autopsy. *Malaria Journal*. 2017;16.
18. Karat AS, Maraba N, Tlali M, Charalambous S, Chihota VN, Churchyard GJ, et al. Performance of verbal autopsy methods in estimating HIV-associated mortality among adults in South Africa. *BMJ Global Health*. 2018;3(4).
19. Kahn K, Collinson MA, Gomez-Olive FX, Mokoena O, Twine R, Mee P, et al. Profile: Agincourt health and socio-demographic surveillance system. *Int J Epidemiol*. 2012;41(4):988-1001.
20. Crampin AC, Dube A, Mboma S, Price A, Chihana M, Jahn A, et al. Profile: The Karonga Health and Demographic Surveillance System. *International Journal of Epidemiology*. 2012;41(3):676-85.
21. Murray CJL, Lopez AD, Black R, Ahuja R, Ali SM, Baqui A, et al. Population Health Metrics Research Consortium gold standard verbal autopsy validation study: design, implementation, and development of analysis datasets. *Population Health Metrics*. 2011;9.
22. Atkinson MA, Eisenbarth GS, Michels AW. Type 1 diabetes. *The Lancet*. 383(9911):69-82.
23. Thomas NJ, Jones SE, Weedon MN, Shields BM, Oram RA, Hattersley AT. Frequency and phenotype of type 1 diabetes in the first six decades of life: a cross-sectional, genetically stratified survival analysis from UK Biobank. *The Lancet Diabetes & Endocrinology*. 6(2):122-9.
24. Alemu S, Dessie A, Seid E, Bard E, Lee PT, Trimble ER, et al. Insulin-requiring diabetes in rural Ethiopia: should we reopen the case for malnutrition-related diabetes? *Diabetologia*. 2009;52(9):1842-5.
25. Marshall SL, Edidin D, Arena VC, Becker DJ, Bunker CH, Gishoma C, et al. Prevalence and incidence of clinically recognized cases of Type 1 diabetes in children and adolescents in Rwanda, Africa. *Diabet Med*. 2015;32(9):1186-92.
26. Davies J, Abimiku A, Alogo M, Mullan Z, Nugent R, Schneidman M, et al. Sustainable clinical laboratory capacity for health in Africa. *The Lancet Global health*. 2017;5(3):e248-e9.
27. Atun R, Davies JI, Gale EAM, Bärnighausen T, Beran D, Kengne AP, et al. Diabetes in sub-Saharan Africa: from clinical care to health policy. *The Lancet Diabetes & Endocrinology*. 5(8):622-67.
28. Beran D, Yudkin JS, de Courten M. Access to Care for Patients With Insulin-Requiring Diabetes in Developing Countries: Case studies of Mozambique and Zambia. *Diabetes Care*. 2005;28(9):2136-40.
29. Beran D, Ewen M, Laing R. Constraints and challenges in access to insulin: a global perspective. *The Lancet Diabetes & Endocrinology*. 2016;4(3):275-85.
30. Ogle GD, Middlehurst AC, Silink M. The IDF Life for a Child Program Index of diabetes care for children and youth. *Pediatric Diabetes*. 2015;17(5):374-84.
31. Gill CJ, Sabin L, Schmid CH. Why clinicians are natural bayesians. *British Medical Journal*. 2005;330(7499):1080-3.
32. Sirota M, Kostopoulou O, Round T, Samaranyaka S. Prevalence and Alternative Explanations Influence Cancer Diagnosis: An Experimental Study With Physicians. *Health Psychology*. 2017;36(5):477-85.
33. Hertwig R, Barron G, Weber EU, Erev I. Decisions from experience and the effect of rare events in risky choice. *Psychological Science*. 2004;15(8):534-9.



1  
2  
3  
4  
5  
6  
7  
8  
9  
10  
11  
12  
13  
14  
15  
16  
17  
18  
19  
20  
21  
22  
23  
24  
25  
26  
27  
28  
29  
30  
31  
32  
33  
34  
35  
36  
37  
38  
39  
40  
41  
42  
43  
44  
45  
46  
47  
48  
49  
50  
51  
52  
53  
54  
55  
56  
57  
58  
59  
60

34. Hamm RM. Physicians neglect base rates, and it matters. Behavioral and Brain Sciences. 1996;19(1):25-&.

For peer review only

1  
2  
3  
4  
5  
6  
7  
8  
9  
10  
11  
12  
13  
14  
15  
16  
17  
18  
19  
20  
21  
22  
23  
24  
25  
26  
27  
28  
29  
30  
31  
32  
33  
34  
35  
36  
37  
38  
39  
40  
41  
42  
43  
44  
45  
46  
47  
48  
49  
50  
51  
52  
53  
54  
55  
56  
57  
58  
59  
60

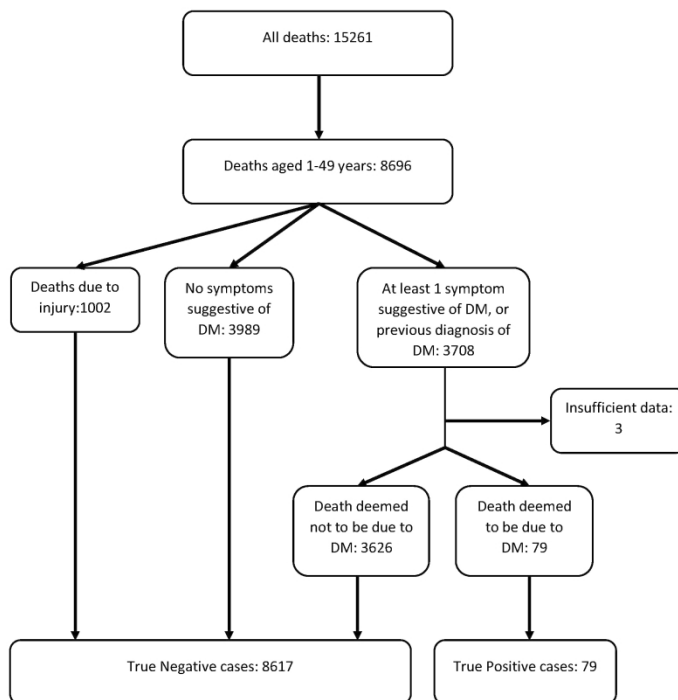

Figure 1. Study flow chart  
209x297mm (300 x 300 DPI)

1  
2  
3  
4  
5  
6  
7  
8  
9  
10  
11  
12  
13  
14  
15  
16  
17  
18  
19  
20  
21  
22  
23  
24  
25  
26  
27  
28  
29  
30  
31  
32  
33  
34  
35  
36  
37  
38  
39  
40  
41  
42  
43  
44  
45  
46  
47  
48  
49  
50  
51  
52  
53  
54  
55  
56  
57  
58  
59  
60

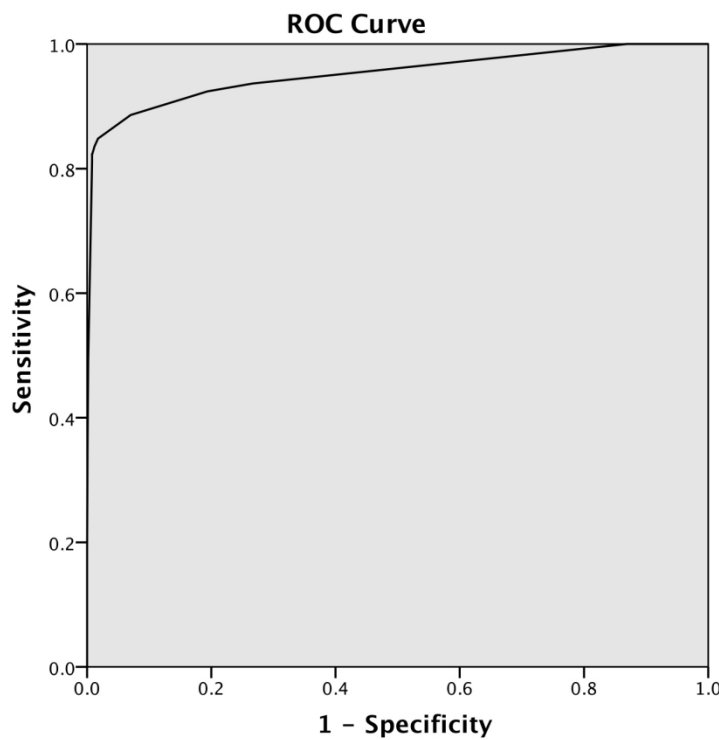

Figure 2. ROC curve for weighted score  
165x131mm (300 x 300 DPI)

## Appendix

**Table 1: Comparison between the study physician, the weighted score, and the interVA4 weighted-score applied to deaths in Agincourt**

|                                      | <50% likelihood of VAC1 being due to diabetes (n=8639) | CACC (n=58) |
|--------------------------------------|--------------------------------------------------------|-------------|
| Study negative cases total (8617)    | 8572                                                   | 48          |
| SPCC (n=77)                          | 67                                                     | 10          |
| Weighted score negative cases (8565) | 8519                                                   | 46          |
| WSCC (132)                           | 120                                                    | 12          |

CACC were defined as VA cause 1 greater than 50% probability due to type 1 diabetes

**Table 2: Univariate testing for positive and negative predictors of study-physician defined cases**

| Symptom                           | % in positive cases (n=77) | % in negative cases (n=8617) | p      |
|-----------------------------------|----------------------------|------------------------------|--------|
| Ante-mortem diagnosis of diabetes | 82.28                      | 0.87                         | <0.001 |
| Polyuria                          | 15.19                      | 2.94                         | <0.001 |
| Polydipsia                        | 49.37                      | 29.00                        | <0.001 |
| Confusion                         | 37.97                      | 17.83                        | <0.001 |
| Weight loss                       | 73.42                      | 55.47                        | 0.001  |
| Chronic abdominal pain            | 5.06                       | 1.01                         | 0.001  |
| Abdominal pain                    | 11.39                      | 2.94                         | <0.001 |
| Wasting                           | 39.24                      | 30.61                        | 0.098  |
| Acute rapid breathing             | 7.60                       | 3.92                         | 0.095  |
| TB and chronic cough              | 5.06                       | 10.90                        | 0.097  |
| Chronic diarrhoea                 | 3.8                        | 11.51                        | 0.032  |

|              |      |       |       |
|--------------|------|-------|-------|
| Injury       | 2.5  | 10.47 | 0.021 |
| Measles      | 7.59 | 2.35  | 0.002 |
| Haematuria   | 5.06 | 2.04  | 0.06  |
| Night sweats | 3.8  | 11.51 | 0.032 |

**Table 3. Multivariable testing with Inter-VA4 algorithm classification of diabetes as likely (>50%) cause of death as the dependent variable.**

|                                   | beta    | SE      | p     |
|-----------------------------------|---------|---------|-------|
| Ante-mortem diagnosis of diabetes | 3.617   | 0.485   | 0     |
| Polyuria                          | 2.7     | 0.492   | 0     |
| Polydipsia                        | 3.837   | 0.374   | 0     |
| Sunken eyes                       | -15.208 | 964.671 | 0.987 |
| Wheeze                            | -16.068 | 663.968 | 0.981 |
| Night sweats                      | -14.858 | 671.399 | 0.982 |
| wasting                           | -4.408  | 1.154   | 0     |
| Abdominal swelling                | -3.476  | 1.38    | 0.012 |
| Chronic cough                     | -2.64   | 1.083   | 0.015 |
| Chronic fever                     | -1.613  | 0.476   | 0.001 |

1  
2  
3  
4  
5  
6  
7  
8  
9  
10  
11  
12  
13  
14  
15  
16  
17  
18  
19  
20  
21  
22  
23  
24  
25  
26  
27  
28  
29  
30  
31  
32  
33  
34  
35  
36  
37  
38  
39  
40  
41  
42  
43  
44  
45  
46  
47  
48  
49  
50  
51  
52  
53  
54  
55  
56  
57  
58  
59  
60

For peer review only

## TRIPOD Checklist: Prediction Model Development and Validation

| Section/Topic                | Item | Checklist Item | Page                                                                                                                                                                                                  |                         |
|------------------------------|------|----------------|-------------------------------------------------------------------------------------------------------------------------------------------------------------------------------------------------------|-------------------------|
| <b>Title and abstract</b>    |      |                |                                                                                                                                                                                                       |                         |
| Title                        | 1    | D;V            | Identify the study as developing and/or validating a multivariable prediction model, the target population, and the outcome to be predicted.                                                          | 1                       |
| Abstract                     | 2    | D;V            | Provide a summary of objectives, study design, setting, participants, sample size, predictors, outcome, statistical analysis, results, and conclusions.                                               | 3                       |
| <b>Introduction</b>          |      |                |                                                                                                                                                                                                       |                         |
| Background and objectives    | 3a   | D;V            | Explain the medical context (including whether diagnostic or prognostic) and rationale for developing or validating the multivariable prediction model, including references to existing models.      | 5                       |
|                              | 3b   | D;V            | Specify the objectives, including whether the study describes the development or validation of the model or both.                                                                                     | 6                       |
| <b>Methods</b>               |      |                |                                                                                                                                                                                                       |                         |
| Source of data               | 4a   | D;V            | Describe the study design or source of data (e.g., randomized trial, cohort, or registry data), separately for the development and validation data sets, if applicable.                               | 6-7                     |
|                              | 4b   | D;V            | Specify the key study dates, including start of accrual; end of accrual; and, if applicable, end of follow-up.                                                                                        | 6-7                     |
| Participants                 | 5a   | D;V            | Specify key elements of the study setting (e.g., primary care, secondary care, general population) including number and location of centres.                                                          | 6-9                     |
|                              | 5b   | D;V            | Describe eligibility criteria for participants.                                                                                                                                                       | 8                       |
|                              | 5c   | D;V            | Give details of treatments received, if relevant.                                                                                                                                                     | NA                      |
| Outcome                      | 6a   | D;V            | Clearly define the outcome that is predicted by the prediction model, including how and when assessed.                                                                                                | 6-7                     |
|                              | 6b   | D;V            | Report any actions to blind assessment of the outcome to be predicted.                                                                                                                                | NA                      |
| Predictors                   | 7a   | D;V            | Clearly define all predictors used in developing or validating the multivariable prediction model, including how and when they were measured.                                                         | 11-12;<br>16-17         |
|                              | 7b   | D;V            | Report any actions to blind assessment of predictors for the outcome and other predictors.                                                                                                            | NA                      |
| Sample size                  | 8    | D;V            | Explain how the study size was arrived at.                                                                                                                                                            | 6-7                     |
| Missing data                 | 9    | D;V            | Describe how missing data were handled (e.g., complete-case analysis, single imputation, multiple imputation) with details of any imputation method.                                                  | NA                      |
| Statistical analysis methods | 10a  | D              | Describe how predictors were handled in the analyses.                                                                                                                                                 | 11-12;<br>16-17         |
|                              | 10b  | D              | Specify type of model, all model-building procedures (including any predictor selection), and method for internal validation.                                                                         | 11-12                   |
|                              | 10c  | V              | For validation, describe how the predictions were calculated.                                                                                                                                         | 12-13                   |
|                              | 10d  | D;V            | Specify all measures used to assess model performance and, if relevant, to compare multiple models.                                                                                                   | 9                       |
|                              | 10e  | V              | Describe any model updating (e.g., recalibration) arising from the validation, if done.                                                                                                               | NA                      |
| Risk groups                  | 11   | D;V            | Provide details on how risk groups were created, if done.                                                                                                                                             | NA                      |
| Development vs. validation   | 12   | V              | For validation, identify any differences from the development data in setting, eligibility criteria, outcome, and predictors.                                                                         | 9                       |
| <b>Results</b>               |      |                |                                                                                                                                                                                                       |                         |
| Participants                 | 13a  | D;V            | Describe the flow of participants through the study, including the number of participants with and without the outcome and, if applicable, a summary of the follow-up time. A diagram may be helpful. | Figure 1                |
|                              | 13b  | D;V            | Describe the characteristics of the participants (basic demographics, clinical features, available predictors), including the number of participants with missing data for predictors and outcome.    | 7                       |
|                              | 13c  | V              | For validation, show a comparison with the development data of the distribution of important variables (demographics, predictors and outcome).                                                        | Table 4                 |
| Model development            | 14a  | D              | Specify the number of participants and outcome events in each analysis.                                                                                                                               | Table 4, page 10        |
|                              | 14b  | D              | If done, report the unadjusted association between each candidate predictor and outcome.                                                                                                              | NA                      |
| Model specification          | 15a  | D              | Present the full prediction model to allow predictions for individuals (i.e., all regression coefficients, and model intercept or baseline survival at a given time point).                           | Page 12, tables 2 and 3 |
|                              | 15b  | D              | Explain how to use the prediction model.                                                                                                                                                              | Table 2                 |
| Model performance            | 16   | D;V            | Report performance measures (with CIs) for the prediction model.                                                                                                                                      | Figure 2, table 3       |
| Model-updating               | 17   | V              | If done, report the results from any model updating (i.e., model specification, model performance).                                                                                                   | NA                      |
| <b>Discussion</b>            |      |                |                                                                                                                                                                                                       |                         |
| Limitations                  | 18   | D;V            | Discuss any limitations of the study (such as nonrepresentative sample, few events per predictor, missing data).                                                                                      | Page 15                 |
| Interpretation               | 19a  | V              | For validation, discuss the results with reference to performance in the development data, and any other validation data.                                                                             | Page 14/15              |
|                              | 19b  | D;V            | Give an overall interpretation of the results, considering objectives, limitations, results from similar studies, and other relevant evidence.                                                        | Page 14/15              |
| Implications                 | 20   | D;V            | Discuss the potential clinical use of the model and implications for future research.                                                                                                                 | Page 15                 |

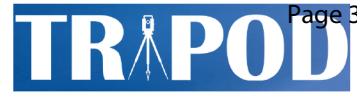

TRIPOD Checklist: Prediction Model Development and Validation

| Other information         |    |     |                                                                                                                               |        |
|---------------------------|----|-----|-------------------------------------------------------------------------------------------------------------------------------|--------|
| Supplementary information | 21 | D;V | Provide information about the availability of supplementary resources, such as study protocol, Web calculator, and data sets. | NA     |
| Funding                   | 22 | D;V | Give the source of funding and the role of the funders for the present study.                                                 | Page 9 |

\*Items relevant only to the development of a prediction model are denoted by D, items relating solely to a validation of a prediction model are denoted by V, and items relating to both are denoted D;V. We recommend using the TRIPOD Checklist in conjunction with the TRIPOD Explanation and Elaboration document.

1  
2  
3  
4  
5  
6  
7  
8  
9  
10  
11  
12  
13  
14  
15  
16  
17  
18  
19  
20  
21  
22  
23  
24  
25  
26  
27  
28  
29  
30  
31  
32  
33  
34  
35  
36  
37  
38  
39  
40  
41  
42  
43  
44  
45  
46  
47  
48  
49  
50  
51  
52  
53  
54  
55  
56  
57  
58  
59  
60



# BMJ Open

## Ability of Verbal Autopsy data to detect deaths due to uncontrolled hyperglycaemia; testing existing methods and development and validation of a novel weighted score

|                                 |                                                                                                                                                                                                                                                                                                                                                                                                                                                                                                                                              |
|---------------------------------|----------------------------------------------------------------------------------------------------------------------------------------------------------------------------------------------------------------------------------------------------------------------------------------------------------------------------------------------------------------------------------------------------------------------------------------------------------------------------------------------------------------------------------------------|
| Journal:                        | <i>BMJ Open</i>                                                                                                                                                                                                                                                                                                                                                                                                                                                                                                                              |
| Manuscript ID                   | bmjopen-2018-026331.R1                                                                                                                                                                                                                                                                                                                                                                                                                                                                                                                       |
| Article Type:                   | Research                                                                                                                                                                                                                                                                                                                                                                                                                                                                                                                                     |
| Date Submitted by the Author:   | 13-Jun-2019                                                                                                                                                                                                                                                                                                                                                                                                                                                                                                                                  |
| Complete List of Authors:       | Blackstock, Sarah; Great Ormond Street Hospital For Children NHS Foundation Trust<br>Witham, Miles ; University of Dundee, School of Medicine; University of the Witwatersrand School of Public Health,<br>Wade, Alisha; university of the Witwatersrand<br>Crampin, Amelia; London School of Hygiene and Tropical Medicine<br>Beran, David; Division of Tropical and Humanitarian Medicine<br>Ogle, Graham; International Diabetes Federation Life for a Child Program<br>Davies, Justine ; King's College London, Centre for Global Health |
| <b>Primary Subject Heading</b>: | Diabetes and endocrinology                                                                                                                                                                                                                                                                                                                                                                                                                                                                                                                   |
| Secondary Subject Heading:      | Epidemiology, Health policy                                                                                                                                                                                                                                                                                                                                                                                                                                                                                                                  |
| Keywords:                       | Epidemiology < TROPICAL MEDICINE, DIABETES & ENDOCRINOLOGY, Health informatics < BIOTECHNOLOGY & BIOINFORMATICS                                                                                                                                                                                                                                                                                                                                                                                                                              |
|                                 |                                                                                                                                                                                                                                                                                                                                                                                                                                                                                                                                              |

SCHOLARONE™  
Manuscripts

1  
2  
3 **Ability of Verbal Autopsy data to detect deaths due to uncontrolled hyperglycaemia; testing existing methods and development and validation of a novel**  
4 **weighted score**  
5  
6  
7

8 Sarah Blackstock, Miles Witham, Alisha N. Wade, Amelia Crampin, David Beran, Graham Ogle, Justine I Davies \*

9  
10 \* Justine Davies is corresponding author. [Justine.davies@kcl.ac.uk](mailto:Justine.davies@kcl.ac.uk)

11  
12  
13 - Dr Sarah J. Blackstock. Great Ormond Street Hospital, London/ London School of Hygiene and Tropical Medicine  
14

15  
16 - Prof Miles Witham. AGE Research Group, Institute for Neuroscience and NIHR Newcastle Biomedical Research Centre, Newcastle University and Newcastle  
17 Upon Tyne Hospitals NHS Foundation Trust, Newcastle, UK.; MRC/Wits Rural Public Health and Health Transitions Research Unit, School of Public Health,  
18 University of the Witwatersrand  
19  
20

21  
22  
23 - Dr. Alisha N. Wade. MRC/Wits Rural Public Health and Health Transitions Research Unit, School of Public Health, University of the Witwatersrand  
24

25  
26 - Prof Mia Crampin. Malawi Epidemiology and Intervention Research Unit (MEIRU), Lilongwe, Malawi; London School of Hygiene and Tropical Medicine,  
27 London, UK  
28  
29

30  
31 - Dr. David Beran. Division of Tropical and Humanitarian Medicine, University of Geneva and Geneva University Hospitals  
32

33  
34 - Dr. Graham D. Ogle. International Diabetes Federation Life for a Child Program, Glebe, NSW, Australia  
35  
36  
37  
38  
39  
40  
41  
42  
43  
44  
45  
46  
Diabetes NSW & ACT, Glebe, NSW, Australia

1  
2  
3  
4  
5  
6 - Prof Justine Davies. [j.davies.6@bham.ac.uk](mailto:j.davies.6@bham.ac.uk). Institute of Applied Health Research. Birmingham University, UK; Centre for Global Health, King's College  
7 London, London, UK; MRC/Wits Rural Public Health and Health Transitions Research Unit, School of Public Health, University of the Witwatersrand.  
8  
9

### 10 11 Contributors

12 JD conceived of the idea. JD, MW, GO, DB, SB, AW, and AC inputted into the development of the idea. MW, JD, and SB did the analyses. SB, AW, and AC  
13 reviewed VA data. JD, MW, GO, DB, SB, AW, and AC contributed to writing and approving the manuscript.  
14  
15  
16

### 17 18 Acknowledgements

19 We acknowledge Osman Sankoh director of the INDEPTH network, and Kathy Kahn and Steve Tollman Directors of the MRC/Wits Rural Public Health and  
20 Health Transitions Research Unit for their support with this project.  
21  
22  
23  
24  
25  
26  
27  
28  
29  
30  
31  
32  
33  
34  
35  
36  
37  
38  
39  
40  
41  
42  
43  
44  
45  
46

## Abstract

### Objectives

Verbal autopsy (VA) is a useful tool to ascertain cause of death where no other mechanisms exist. We aimed to assess the utility of VA data to ascertain deaths due to uncontrolled hyperglycaemia and to develop a weighted score (WS) to specifically identify cases. Cases were identified by a study or site physician with training in diabetes. These diagnoses were also compared with diagnoses produced by a standard computer algorithm (InterVA-4).

### Setting

This study was done using VA data from the Health and Demographic Survey sites in Agincourt, in Rural South Africa. Validation of the WS was done using VA data from Karonga in Malawi

### Participants

All deaths from ages 1-49 years between 1992 and 2015 and 2002-2016 from Agincourt and Karonga, respectively. There were 8699 relevant deaths in Agincourt and 1663 from Karonga.

### Results

Of the Agincourt deaths, there were 77 study physician classified cases and 58 computer algorithm classified cases. Agreement between study physician classified cases and computer algorithm classified cases was poor (Cohen's kappa 0.14). Our weighted score produced a receiver operator curve with AUC of 0.952 (95% CI 0.920-0.985). However, positive predictive value (PPV) was below 50% when the WS was applied to the development set and the score was dominated by the necessity for a pre-mortem diagnosis of diabetes. Independent validation showed the WS performed reasonably against site physician classified cases with sensitivity of 86%, specificity of 99%, PPV of 60% and negative predictive value of 99%.

## Conclusion

Our results suggest that widely used VA methodologies may be missing deaths due to uncontrolled hyperglycaemia. Our WS may offer improved ability to detect deaths due to uncontrolled hyperglycaemia in large populations studies where no other means exist.

## Article Summary

### Strengths and limitations of the study:

- It is possible for physicians to interpret verbal autopsy data to ascertain cases premature mortality due to uncontrolled hyperglycaemia with reasonable inter-rater reliability
- A simple, validated, algorithm can be used to find cases of uncontrolled hyperglycaemia using VA data
- Methods can only be used where verbal autopsy systems exist
- There was no gold standard laboratory diagnosis to confirm our findings

## Introduction

Hyperglycaemic emergencies, namely diabetic ketoacidosis and hyperglycaemic hyperosmolar state (HHS) are preventable causes of premature mortality. Both of these conditions occur in individuals with uncontrolled diabetes mellitus and are usually precipitated by intercurrent illness (1). While DKA is classically seen in patients with type 1 diabetes and has inadequate insulin therapy as a frequent precipitant and HHS is classically seen in type 2 diabetes, either of these hyperglycaemic emergencies may be seen in either type of diabetes (1). DKA is the leading cause of mortality in younger people with type 1 diabetes (2) and mortality from HHS ranges from 10-20% (3).

Mortality from hyperglycaemic emergencies has decreased significantly in high income countries (1, 4), largely due to improved diagnosis and treatment of these conditions. By contrast, deaths from these acute complications of uncontrolled hyperglycaemia remain high in lower and middle-income countries (LMICs) (5-8). While delays in presenting to health facilities undoubtedly contribute, deaths from hyperglycaemic emergencies are an indicator of an unmet need for diabetes care. Long term glycaemic control as well as rapid diagnosis and treatment of decompensated diabetes would significantly reduce mortality from these conditions.

Little data exist on the mortality rates in hyperglycaemic emergencies in LMICs and the data that do exist have often been obtained from hospital records (7, 8) and therefore may underestimate true mortality as they do not capture those deaths that occur out of hospital. Verbal autopsy (VA), has been developed to address the deficit of accurate, country-wide, reporting of cause of death in many LMICs (9, 10) and may improve mortality estimates in these conditions. VA from population samples is a useful tool to ascertain causes of mortality and trends thereof. (11-13) During VA, a respondent – usually a relative - who cared for the deceased during their last illness is asked a set of standard questions about the illness by a trained data collector. (14, 15) VA reports are either reviewed by physicians who assign a cause of death or increasingly, are processed automatically by computer models to derive likely causes of death. Such models (for example InterVA-4) are derived using a mixture of data and expert opinion.(16) They have been shown to be reasonably reliable in determining

1  
2  
3 causes of death which are commonly seen, but data on reliability of these methods for estimating causes of death for less prevalent diseases are lacking. (11,  
4 16-18)  
5  
6

7  
8 Where there are classic features of an acute death from hyperglycaemia (symptom combinations including diagnosis of diabetes; increased thirst; increased  
9 urine output; coma, etc.) it is relatively straightforward either for a reviewing physician or an automated model like InterVA-4 to arrive at a high likelihood of  
10 diabetes as a cause of death. However, for many people living with diabetes, the symptoms occurring around the time of death may be less obvious, especially  
11 in contexts where symptoms of hyperglycaemia can be attributable to other, more common conditions. In these cases, increased index of reviewing physician  
12 suspicion, for example due to greater exposure-to or knowledge-of the disease, may improve detection of the condition.  
13  
14  
15

16  
17  
18 We therefore aimed to assess ability of the VA methodology, using inter-VA4 algorithm determined cause of death, to detect deaths attributable to  
19 uncontrolled hyperglycaemia, as compared with diagnoses made by a study physician with experience of diabetes care in a LMIC setting. A further aim was  
20 to derive and test a weighted score (WS) – which could later be applied to other settings using VA reports – for detecting deaths due to uncontrolled  
21 hyperglycaemia and validate this WS in VA data from an independent dataset. Other aims were to compare our weighted-score and the study-physician  
22 diagnoses. We limited our age range to between 1 and 49 years of age with an aim of particularly focussing on premature mortality due to uncontrolled  
23 hyperglycaemia.  
24  
25  
26  
27  
28

## 29 30 **Methods**

### 31 *Setting and VA methodology*

32  
33 Our study was done using VA data from the Agincourt Health and socio-Demographic Surveillance System (HDSS) and validated using data from the Karonga  
34 HDSS in Malawi. (19, 20) The Agincourt HDSS is based in the Agincourt sub-district of rural, northeast South Africa, near the Mozambique border; the Karonga  
35 HDSS is based in the south of Karonga district, in rural northern Malawi. From Agincourt, we used VA data collected on annual census visits between 1992  
36 and 2015; from Karonga we used VA data collected at household visits initiated after reporting of a death by a community informant at monthly reporting  
37  
38  
39  
40  
41  
42

1  
2  
3 session between 2002 and 2016. VA methodology is described in detail elsewhere.(16) In brief, for any death, household members are approached and asked  
4 to take part in an interview based on standard WHO questionnaires and administered by a local, trained, data collector, or medical assistant. VA questionnaires  
5 consist of responses (which are converted to binary for processing with InterVA-4) to a range of questions on signs, symptoms, and diagnoses during the  
6 terminal illness. Some VAs (for example those in Agincourt and Malawi) also have a 'free text' section where respondents are able to freely describe  
7 circumstances leading up to the death. In Agincourt, prior to 2010, cause of death was defined by physician review of each VA. After 2010, all causes of death  
8 have been determined using Inter-VA computer algorithms; all VAs have also been retrospectively formatted for input into InterVA-4 with binary variables  
9 (presence of symptom or absence/unknown). In Karonga, both physician review and computer models are used; two physicians review – blind to each other's  
10 coding – and allocate underlying cause of death as well as direct and contributory causes.(20) Where there is discrepancy between physicians, a third reviewer  
11 considers the VA and the responses of the first two physicians and decides on the cause(s) of death to be coded. Questionnaire and free text responses are  
12 de-identified and stored in electronic databases.  
13  
14  
15  
16  
17  
18  
19  
20

#### 21 *Participant selection and creation of study-physician coded dataset*

22 Given the rarity of presenting with uncontrolled hyperglycaemia in infants under 1 year old, the increased likelihood of deaths being due to other competing  
23 causes in those of older years, and our focus on premature mortality, we *a priori* agreed to restrict our sample age range to deaths occurring between 1 and  
24 49 years of age, inclusive. To enable later application of the WS to other VA datasets, we aligned our age range selection with the WHO 2012 standard VA  
25 age-groups and therefore included those in VA age groups "under 5" (1-4), "child" (5-14), and "adult" (15-49).  
26  
27  
28  
29  
30

31 Data sets which use clinical data including hospital diagnoses and laboratory results to provide a gold standard cause of death have been developed and  
32 enable testing of standard VA methodologies. However, the VA input parameters collected in these data sets are not complete,(12, 21) and although fields  
33 of use for diagnosing diabetes – for example polyuria and polydipsia - are present in standard VA questionnaires, they are not captured in these gold standard  
34 sets. We therefore created a study-physician coded data set which was to act as our "gold-standard". A clinician with experience in diabetes management in  
35 HIC and LMICs (SB) reviewed all data from VA records at Agincourt. Study physician classified cases were determined using responses to the answers to VA  
36  
37  
38  
39  
40  
41  
42  
43  
44  
45  
46



1  
2  
3 questions and examination of the free text. Cases were defined as those for whom uncontrolled hyperglycaemia would be acceptable as the main cause of  
4 death on a standard death certificate. Any cases where the reviewing physician was unsure were discussed with clinical colleagues with expertise in adult  
5 internal medicine, diabetes and endocrinology (AW, JD, and MW) until consensus was reached.  
6  
7

8  
9  
10 Given the likely rarity of study physician classified cases, we produced an enriched sample of cases for study-physician review by searching the VA database  
11 for cases with features suggestive of uncontrolled hyperglycaemia as individual symptoms, symptom combinations, or terms (chosen to reflect both chronic  
12 and acute symptoms of diabetes), as follows:  
13

- 14 • Ante-mortem (AM) diagnosis of diabetes
- 15 • Polyuria
- 16 • Polydipsia
- 17 • Weight loss combined with polyuria or polydipsia
- 18 • Weight loss combined with polyuria or polydipsia and in combination with acute rapid breathing, abdominal pain, confusion, or coma
- 19 • 'Sugar' or 'diabetes' in the free text search
- 20 • Site-physician review indication of deaths due to diabetes (in Agincourt VA data prior to 2010)

21  
22 Any cases that did not have any of the above features were thought clinically unlikely to have died from uncontrolled hyperglycaemia and were therefore  
23 categorised as deaths from other causes (hereafter termed 'negative cases').  
24  
25  
26

### 27 *Comparison of study physician classified cases with computer algorithm classified cases*

28  
29 We compared the predictive value of InterVA-4 (with positive cases termed computer algorithm classified cases) against study physician classified cases in  
30 the Agincourt dataset using Chi Squared and used Cohen's kappa as a measure of inter-rater correlation, with the recognition that the 'raters' in this context  
31 included algorithms. As there is no InterVA-4 category of cause of death due to hyperglycaemia, computer algorithm classified cases were defined as  
32 determined by Inter-VA-4 as being greater than 50% likely to be due to diabetes.  
33  
34  
35  
36  
37  
38  
39  
40  
41  
42

### *Development of predictive score*

After producing a set of study physician classified cases and negative cases, we tested the predictive value of VA-recorded variables. These variables were chosen after consensus was reached by study clinicians on which were likely to be seen in uncontrolled hyperglycaemia in clinical practice (as either subacute/chronic features ). (22) Additionally, we identified symptom variables which we thought would reduce likelihood of a death being due to uncontrolled hyperglycaemia and which were captured by the VA questions. We performed univariable testing of each individual above defined symptoms for its ability to predict study physician classified cases using the chi squared test. Symptoms which were significant univariable predictors at  $p < 0.1$  (Pearson's chi squared) were entered into a multivariable binary logistic regression model using stepwise entry. A weighted score was then developed based on the relative beta-weights in the final multivariable model.

We constructed a receiver-operator characteristic (ROC) curve based on the relationship between the weighted score for each individual VA entry and study physician classified cases. We then determined the sensitivity, specificity, positive, and negative predictive values (PPV and NPV) of the weighted score at various cut points.

### *Score validation*

We used VA data from Karonga HDSS in Malawi to externally validate our weighted score. Cases above a cut-point determined based on analysis of Agincourt data were extracted for review and these 'weighted-score classified cases' were compared with Karonga site-physician classified cases.

In addition, and to allow for differences between Karonga site-physician diagnosis and one made by a physician with expertise in diabetes and experience in working in a LMIC setting, in a sample of 100 cases we compared weighted score classified cases with classification by an independent endocrinologist (AW; who determined independent physician classified cases [investigator physician classified cases]). These 100 cases were made up of all weighted score classified cases plus a random selection of cases not determined to be deaths due to uncontrolled hyperglycaemia [by the WS or site-physician].

1  
2  
3  
4  
5 We compared computer algorithm classified cases and study physician classified cases with weighted score classified cases in the Agincourt dataset using Chi  
6 Squared. We also describe the predictive value of symptoms identified by multivariable analysis in determining computer algorithm classified cases.  
7  
8

#### 9 10 *Determining timing of diagnosis of diabetes*

11 For study physician classified cases or weighted score classified cases, we ascertained which cases had been diagnosed with diabetes prior to or during the  
12 final illness by examining responses to the VA question, “did the deceased have diabetes” and examining the VA free texts. Cases where it was stated in the  
13 free text that diagnoses of diabetes were given, or patients were told their sugar levels were high in the final illness, with no noted prior history of diabetes  
14 on VA question response were assumed to have been diagnosed in the final illness. We assumed that diabetes was diagnosed prior to the final illness in cases  
15 where it was stated in the free text that patients were known to have diabetes. Cases where there was no mention of diabetes in the free text were classified  
16 as unknown.  
17  
18  
19  
20  
21

#### 22 23 Statistical analysis

24 SPSS v22 (IBM, New York, USA) was used for all analyses.  
25  
26  
27

#### 28 29 Patient and public involvement

30 No patients were involved in this study  
31  
32

#### 33 34 Ethical approval

35 Ethical approval for this study was given by The London School of Tropical Medicine and Hygiene’s Ethical Review Board. Permission to use VA data in  
36 secondary analyses has been given by the University of Witwatersrand (for Agincourt) and Malawi College of Medicine Ethical review Board.  
37  
38  
39  
40  
41  
42

1  
2  
3 The study and manuscript write up was conducted in accordance with the TRIPOD guidelines.  
4  
5

## 6 **Results**

### 7 *Determining study physician classified cases*

8  
9  
10 There were 15,261 deaths occurring in the Agincourt HDSSs which had a VA report completed between 1992 and 2015, of which 8699 were between the ages  
11 of 1-49 years. After limiting cases to those with symptoms suggestive of uncontrolled hyperglycaemia, there were 3708 cases which were reviewed by the  
12 study-physician. There were two cases with missing data. Of all VA reports reviewed, 77 cases were determined as positive (study physician classified cases),  
13 3626 were negative, and 3 were deemed indeterminate even after discussion amongst investigators. Figure 1 shows the flow of classification of VA cases at  
14 Agincourt into study physician classified cases and negative cases.  
15  
16  
17  
18  
19

### 20 *Comparison of study physician classified cases with computer algorithm classified cases*

21  
22 There were 58 computer algorithm classified cases. Chi squared testing showed that there was dependence between study physician classified cases and  
23 computer algorithm classified cases (Pearson chi-squared of 176, 1 degree of freedom,  $p < 0.001$ ), however although they were associated on the chi-squared  
24 test (appendix table 1), kappa showed poor concordance, with the VA algorithm not finding the majority of cases identified by the physician; Cohen's Kappa  
25 for inter-rater agreement was low at 0.14.  
26  
27  
28  
29

### 30 *Development of the weighted score*

31  
32 On discussion between investigators, we identified ante-mortem diagnosis of diabetes, polyuria, polydipsia, sunken eyes, weight loss, wasting, acute rapid  
33 breathing, abdominal pain or acute abdominal pain (which are two separate responses on VA), coma, and confusion as being variables collected on VA which  
34 were likely to be seen in cases of deaths due to uncontrolled hyperglycaemia. In environments where tuberculosis and other respiratory conditions are  
35 common causes of death, we did not consider that other symptoms of breathlessness captured on VA were likely to be discriminating enough for our purposes.  
36  
37 Of our potential predictive variables, the nine which were significantly associated with study physician classified cases on univariable testing – and thus  
38  
39  
40  
41  
42  
43  
44  
45  
46

1  
2  
3 entered into the multivariable regression analysis - were ante-mortem diagnosis of diabetes ( $p<0.001$ ), polyuria ( $p=0.001$ ), polydipsia ( $P<0.001$ ), confusion  
4 ( $p<0.001$ ), weight loss ( $p=0.001$ ), chronic abdominal pain ( $p<0.001$ ), abdominal pain ( $p<0.001$ ), acute rapid breathing ( $p=0.095$ ), and wasting ( $p=0.098$ )  
5 (appendix table 2).  
6  
7

8  
9  
10 We identified 27 variables which were captured on the VA questions which were considered to decrease the clinical likelihood of the death being due to  
11 uncontrolled hyperglycaemia; these were HIV, TB, chronic cough, cough, productive cough, bloody cough, TB combined with chronic cough, chronic fever,  
12 whooping cough, wheeze, night sweats, chronic diarrhoea, bloody diarrhoea, jaundice, haematemesis, haematuria, abdominal mass, swollen abdomen,  
13 swollen legs, injury, died in labour, died 24 hours after labour, vaginal bleeding after menopause, kidney disease, liver disease, cancer, or measles. Of these  
14 variables, on univariable testing, we found injury ( $p=0.021$ ), TB combined with chronic cough ( $p=0.097$ ) night sweats (0.032) and chronic diarrhoea (0.032)  
15 were significant negative predictors of positive cases. Haematuria ( $p=0.06$ ), and measles ( $p=0.002$ ) were significant predictors of study physician classified  
16 cases (table1). The positive association between cases and measles lacked face validity. However, haematuria could be a misunderstanding of urinary  
17 frequency also seen in uncontrolled hyperglycaemia. We therefore entered TB combined with chronic cough, chronic diarrhoea, injury, night sweats, and  
18 haematuria into the multivariable regression analysis.  
19  
20  
21  
22  
23  
24  
25

26  
27 The weighted score was produced using variables which were significantly associated with study physician classified cases on binary logistic regression  
28 analysis, scaled to the lowest positive beta weight and rounded up (or down) to the nearest whole number (table 1). This produced a ROC (figure 2) with an  
29 area under the curve (AUC) of 0.952 (95% CI 0.920-0.985). Sensitivity, specificity, negative predictive value, and positive predictive values of various cut-points  
30 for the weighted-score applied to the Agincourt dataset and compared with study-physician cases are shown in Table 2.  
31  
32  
33  
34

35 We chose a cut-point of 8 to identify cases with reasonable specificity whilst maintaining sensitivity. Applying this cut-point in the Agincourt dataset gave  
36 134 weighted score classified cases, thus 1.54% (134/8699) of all deaths were estimated due to uncontrolled hyperglycaemia. Characteristics of these deaths  
37 are shown in table 3. In particular, all had an antemortem diagnosis of diabetes recorded, 62 cases had diabetes diagnosed in the final illness and 24 cases  
38  
39  
40  
41  
42

1  
2  
3 had symptoms on the free text which were determined to be suggestive of uncontrolled hyperglycaemia. Of note, 138 of all VA deaths in the age range of  
4 interest from Agincourt had an antemortem diagnosis of diabetes – four more than those detected by the algorithm.  
5  
6  
7

#### 8 *Comparison of weighted score classified cases with computer algorithm classified cases*

9

10 Appendix table 1 shows the performance of our weighted score in comparison to InterVA-4. Chi squared showed dependence (Pearson chi squared of 146, 1  
11 degree of freedom,  $p < 0.001$ ), however, inter-rater agreement was poor (Cohen's kappa).  
12  
13

#### 14 *Validation of the WS*

15

16 We validated our WS using VA data from Karonga in Malawi. There were 3614 VA reports between 2001 and 2016; 1663 of these were from people between  
17 1 and 49 years old. Application of our WS to Karonga VA data and use of a cut-point of 8 or above, identified 20 cases of deaths due to uncontrolled  
18 hyperglycaemia (table 3). Comparison of these 20 weighted score classified cases with site physician classified cases (as either the underlying or contributory  
19 cause) showed 12 weighted score classified cases which were true positives; the Karonga site-physician also identified an additional two case of deaths from  
20 diabetes which the algorithm did not detect. Thus, giving a sensitivity of 86%, specificity of 99%, PPV of 60% and negative predictive value of 99%.  
21  
22  
23

24 Of the 20 weighted score classified cases, all were in the adult age group; nine between 20-29, five between 30-39, and six between 40-49 years of age. All  
25 cases had a pre-mortem diagnosis of diabetes, and we determined that 4 of these diagnoses were made in the final illness (of note 22 deaths in the whole  
26 Karonga VA dataset for this age range had pre-mortem diagnosis of diabetes). 10 relatives reported symptoms on the free text that were suggestive of  
27 uncontrolled hyperglycaemia, and for 7 of the 20 weighted-score detected cases, relatives recalled being told by treating healthcare workers that the death  
28 was caused by diabetes (table 3).  
29  
30  
31  
32  
33

34  
35 Out of the 100 cases assessed, the external investigator-physician (AW) determined that a total of 22 were due to uncontrolled hyperglycaemia, 74 deaths  
36 were not due to uncontrolled hyperglycaemia, and 4 were unclassifiable due to missing data. Compared with the external investigator-physician, the weighted  
37 score gave 15 true positives and 7 false negatives. All site physician classified cases were deemed positive by the independent physician investigator. However,  
38  
39  
40  
41  
42

1  
2  
3 compared to the site-physician, the independent physician investigator determined there were an additional nine deaths likely to be due to uncontrolled  
4 hyperglycaemia (kappa for inter-rater agreement = 0.69).  
5  
6

### 7 8 *Performance of clinically determined variables in detecting computer algorithm classified cases*

9  
10 Variables which we determined were clinically likely to increase or decrease chance of death due to uncontrolled hyperglycaemia were tested for association  
11 with computer algorithm classified cases. In univariable testing, we found ante-mortem diagnosis of diabetes ( $p < 0.001$ ), polyuria ( $p < 0.001$ ) and polydipsia  
12 ( $p < 0.001$ ) to be positive predictors these cases. TB and chronic cough ( $p = 0.025$ ), wasting ( $p < 0.001$ ), sunken eyes ( $p = 0.012$ ), chronic diarrhoea ( $p = 0.006$ ),  
13 chronic cough ( $p < 0.001$ ), chronic fever ( $p = 0.003$ ), wheeze ( $p < 0.001$ ), productive cough ( $p = 0.003$ ), night sweats ( $p < 0.001$ ), abdominal swelling ( $p = 0.048$ ), and  
14 injury ( $p = 0.03$ ) were significant negative predictors of diabetes. Results of multivariable testing are shown in appendix table 3. Appendix table 1 shows the  
15 performance of InterVA-4 in comparison to the study-physician categorization.  
16  
17  
18  
19  
20

### 21 **Discussion**

22  
23 There are several key findings from our study. The first is that compared with a physician classification of VA data, the widely used InterVA-4 algorithm  
24 performs poorly in detecting cases of deaths thought clinically likely due to uncontrolled hyperglycaemia. Reports from InterVA-4 on numbers of deaths due  
25 to diabetes should therefore be interpreted with caution. Second, we found that a large number of deaths due to uncontrolled hyperglycaemia only received  
26 a diagnosis of diabetes in their final illness, especially in the Agincourt sample. Verbal Autopsy captures data from carers, rather than health records, and thus  
27 this finding may be overly negative. It is nevertheless troubling, and suggests that further investigation of health system's ability to diagnose and manage  
28 diabetes is needed. Third, it was possible to develop a weighted-score to detect cases of uncontrolled hyperglycaemia, that, at a cutpoint of greater than 8,  
29 had reasonable sensitivity and specificity. Our weighted score also had better agreement with study physician classified cases than the Inter-VA 4 model. On  
30 validation in an independent data set, the score also showed good sensitivity and specificity for predicting deaths due to uncontrolled hyperglycaemia both  
31 when compared to site physician classified cases and investigator physician classified cases. However, the score was dominated by a pre-mortem diagnosis  
32 of diabetes and it could be argued that inclusion of the other factors provided minimal further discriminatory value. Apart from pre-mortem diagnosis of  
33  
34  
35  
36  
37  
38  
39  
40  
41  
42  
43  
44  
45  
46

1  
2  
3 diabetes, the predominant symptoms that our weighted-score detected were related to uncontrolled hyperglycaemia (polydipsia and polyuria). Our score, or  
4 indeed, VA cannot discriminate between deaths due to hyperglycaemia-related complications of type 1 or type 2 diabetes. Additionally, given recent evidence  
5 from HIC which suggests the fall in incidence of type 1 diabetes with age may not be as steep as previously thought (23) and, from sub-Saharan Africa, where  
6 there is some evidence that the peak age of presentation may be older than in other countries, (24, 25), limiting the age range of cases is unlikely to be a  
7 strategy to enable detection of cases of uncontrolled hyperglycaemia due to type 1 diabetes.  
8  
9  
10

11  
12  
13 As mentioned, we found that ante-mortem recording of a diagnosis of diabetes was the strongest predictor of a death being due to uncontrolled  
14 hyperglycaemia, in fact, using our score cut-point of 8, it is not possible to assign diabetes as a cause of death without diabetes having been recorded on the  
15 VA report. This is a further limitation of our score, making it only applicable in settings where health systems are advanced enough to diagnose diabetes or  
16 report hyperglycaemia; unfortunately, in many LMICs, laboratory services are focused on detecting infectious rather than non-communicable diseases.(26)  
17 This lack of diagnostic capacity also impacts upon the ability of health systems to detect and treat diabetes to prevent untimely deaths. Even in countries with  
18 reasonable diagnostic ability, it may not be deployed early enough in the disease course to avert death.(27, 28) Such delayed diagnosis is reflected in our  
19 finding that diagnosis of diabetes was often made in the final illness, suggesting that the death could have been averted if diagnosis had been made earlier in  
20 the illness. Access to diagnostic testing has to be paired with an increased index of suspicion of the diagnosis early in the disease course. We also acknowledge  
21 that even if diagnoses are made, hurdles of access to treatment still need to be overcome (29, 30). Unfortunately, given the small numbers of deaths found  
22 in this study, we were not able to reliably look at temporal trends in access to care.  
23  
24  
25  
26  
27  
28  
29  
30

31  
32 Although we found that our WS performance was substantially more reliable in ascertaining cases of deaths due to uncontrolled hyperglycaemia than InterVA-  
33 4 when applied to Agincourt, our study aim was to look specifically for this condition, and we produced an algorithm that was optimized to find cases. In  
34 contrast, InterVA-4 takes into consideration numerous competing diseases to deliver an adequate performance to determine population-level causes of death  
35 across a wide range of diseases (16) and was not developed to detect single diseases. Furthermore, whilst physicians use both presence and absence of  
36 symptoms to determine diagnoses, InterVA-4 predominately relies upon presence of symptoms. (31) It is also interesting that there were differences between  
37  
38  
39  
40  
41  
42  
43  
44  
45  
46



1  
2  
3 physicians in ascribing uncontrolled hyperglycaemia as a cause of death. These differences are likely to result from different exposure to disease prevalence  
4 and be influenced by the reason for examining the data; it would be expected that physicians who were used to dealing with a condition and who were  
5 specifically looking for that condition would find a greater prevalence of that condition.(32-34) However, that there was reasonable agreement between the  
6 investigator physician (AW) and the algorithm with the Karonga site physician diagnoses is reassuring.  
7  
8  
9

10  
11 There are several limitations of our study. The lack of a gold standard data set which contained both confirmed clinical diagnosis and relevant VA parameters  
12 necessitated our use of a physician to ascertain cases and without laboratory results, the diagnosis can never be certain. To enrich the data-set for clinical  
13 review with likely cases, we also pre-selected cases that had one or more response on VA which could suggest the diagnosis; although it is unlikely that deaths  
14 with no symptoms of uncontrolled hyperglycaemia noted would have died of this condition, it is not impossible. The enrichment of the review dataset to with  
15 these cases could also have led to overfitting of the WS. For this weighted-score development study, we limited the age range of cases to between one and  
16 49 years to ensure that we detected premature mortality and to avoid confounding from competing symptoms that may be seen in older people who likely  
17 have multiple co-morbidities. We may have missed cases in older deaths, and how this weighted score performs in older age groups needs to be the subject  
18 of separate study. As in the development of InterVA-4, we, a priori, decided to use clinical knowledge to guide choice of our input variables of our model.  
19 Whilst we argue that this is a reasonable method for model development, an alternative approach could have been to assess all VA variables for association  
20 and include all those that are statistically significant regardless of clinical validity. Lastly, VA tools to ascertain cause of death are not as accurate as vital  
21 statistics reporting which is based on clinical diagnoses. However, such reporting is lacking in many populations, especially in lower and middle income  
22 countries. In these situations, VA is proven to be a reliable alternative method way of ascertaining cause of death.  
23  
24  
25  
26  
27  
28  
29  
30  
31  
32

33 In summary, we have found that the InterVA-4 algorithm performs poorly at detecting cases of deaths due to uncontrolled hyperglycaemia. Our algorithm  
34 improves detection, however is dominated by necessity for a pre-mortem diagnosis of diabetes with other variables adding little discrimination. We also  
35 found that a high proportion of deaths due to uncontrolled hyperglycaemia received a diagnosis in their final illness. In countries where information on  
36  
37  
38  
39  
40  
41  
42

1  
2  
3  
4  
5  
6  
7  
8  
9  
10  
11  
12  
13  
14  
15  
16  
17  
18  
19  
20  
21  
22  
23  
24  
25  
26  
27  
28  
29  
30  
31  
32  
33  
34  
35  
36  
37  
38  
39  
40  
41  
42  
43  
44  
45  
46

numbers of deaths due to uncontrolled hyperglycaemia is lacking and where VA reports exist, our algorithm can be used to give an indication of the numbers of deaths due to the condition, hence expose health system gaps in the provision of care which would result in earlier diagnosis and treatment.

For peer review only

**Table 1: Binary logistic regression showing variables entered into the weighted-score and derived score weights**

|                                   | Number of cases with symptom | beta   | Standard error | p      | Weighting (beta/0.751) | rounded weight |
|-----------------------------------|------------------------------|--------|----------------|--------|------------------------|----------------|
| Ante-mortem diagnosis of diabetes | 140                          | 6.462  | 0.357          | <0.001 | 8.6045273              | 9              |
| Polyuria                          | 265                          | 1.542  | 0.583          | 0.008  | 2.05326232             | 2              |
| Polydipsia                        | 2539                         | 1.406  | 0.353          | <0.001 | 1.87217044             | 2              |
| Confusion                         | 1569                         | 0.751  | 0.352          | 0.033  | 1                      | 1              |
| TB and chronic cough              | 944                          | -1.627 | 0.716          | 0.023  | -2.1664447             | -2             |
| Chronic diarrhoea                 | 992                          | -2.058 | 0.795          | 0.01   | -2.7403462             | -3             |
| Constant                          | -                            | -7.114 | 0.357          | <0.001 | -                      | -              |

**Table 2: Sensitivity and specificity of the weighted score above different score cut-points (summed weightings) as applied to Agincourt data and tested against study-physician classification of cases**

| Cut-point | Number of deaths above cut-point | Sensitivity (%) | Specificity (%) | PPV (%) | NPV (%) |
|-----------|----------------------------------|-----------------|-----------------|---------|---------|
| 5         | 169                              | 83.54           | 98.91           | 39.05   | 99.85   |
| 6         | 138                              | 82.27           | 99.15           | 47.10   | 99.84   |
| 7         | 136                              | 82.28           | 99.17           | 47.79   | 99.84   |
| 8         | 134                              | 82.28           | 99.20           | 48.01   | 99.84   |
| 9         | 133                              | 81.01           | 99.20           | 48.12   | 99.82   |

**Table 3: Characteristics of people identified by the study physician and the algorithm as having died of diabetes**

|                                                       | Agincourt                           | Agincourt                                           | Karonga                                                   |
|-------------------------------------------------------|-------------------------------------|-----------------------------------------------------|-----------------------------------------------------------|
|                                                       | study physician<br>classified cases | weighted score<br>classified cases<br>(cutpoint >8) | weighted<br>score<br>classified<br>cases<br>(cutpoint >8) |
| Total                                                 | 77                                  | 134                                                 | 20                                                        |
| Infant                                                | 0                                   | 3                                                   | 0                                                         |
| Under 5                                               | 6                                   | 6                                                   | 0                                                         |
| Child                                                 | 3                                   | 3                                                   | 0                                                         |
| Adult                                                 | 68                                  | 122                                                 | 20                                                        |
| Female                                                | 38                                  | 71                                                  | 12                                                        |
| male                                                  | 39                                  | 63                                                  | 8                                                         |
| Any recorded ante-<br>mortem diagnosis of<br>diabetes | 64                                  | 134                                                 | 20                                                        |
| No ante-mortem<br>diagnosis of diabetes               | 13                                  | 0                                                   | 0                                                         |

|                                                               |    |    |    |
|---------------------------------------------------------------|----|----|----|
| Ante-mortem diagnosis of diabetes made in final illness       | 37 | 62 | 4  |
| Ante-mortem diagnosis of diabetes made prior to final illness | 3  | 10 | 10 |
| Unknown when ante-mortem diagnosis of diabetes made           | 24 | 62 | 6  |

Competing interests

We have no competing interests to declare

Funding

There was no external funding for this study.

Data availability

Verbal Autopsy data are accessible through contacting Agincourt or Karonga Health and Demographic Survey sites. Data use agreements apply.

**Fig 1. Study flow chart****Figure 2: ROC curve for weighted score applied to study physician coded dataset**

1. Maletkovic J, Drexler A. Diabetic ketoacidosis and hyperglycemic hyperosmolar state. *Endocrinol Metab Clin North Am.* 2013;42(4):677-95.
2. Umpierrez G, Korytkowski M. Diabetic emergencies - ketoacidosis, hyperglycaemic hyperosmolar state and hypoglycaemia. *Nat Rev Endocrinol.* 2016;12(4):222-32.
3. Pasquel FJ, Umpierrez GE. Hyperosmolar hyperglycemic state: a historic review of the clinical presentation, diagnosis, and treatment. *Diabetes Care.* 2014;37(11):3124-31.
4. Gregg EW, Li Y, Wang J, Burrows NR, Ali MK, Rolka D, et al. Changes in diabetes-related complications in the United States, 1990-2010. *N Engl J Med.* 2014;370(16):1514-23.
5. Anthanont P, Khawcharoenporn T, Tharavanij T. Incidences and outcomes of hyperglycemic crises: a 5-year study in a tertiary care center in Thailand. *J Med Assoc Thai.* 2012;95(8):995-1002.
6. Chung ST, Perue GG, Johnson A, Younger N, Hoo CS, Pascoe RW, et al. Predictors of hyperglycaemic crises and their associated mortality in Jamaica. *Diabetes Res Clin Pract.* 2006;73(2):184-90.
7. Desse TA, Eshetie TC, Gudina EK. Predictors and treatment outcome of hyperglycemic emergencies at Jimma University Specialized Hospital, southwest Ethiopia. *BMC Res Notes.* 2015;8:553.
8. Ekpebegh CO, Longo-Mbenza B, Akinrinmade A, Blanco-Blanco E, Badri M, Levitt NS. Hyperglycaemic crisis in the Eastern Cape province of South Africa: high mortality and association of hyperosmolar ketoacidosis with a new diagnosis of diabetes. *S Afr Med J.* 2010;100(12):822-6.
9. Colin D. Mathers DMF, Mie Inoue, Chalapati Rao, Alan D. Lopez. Counting the dead and what they died from: an assessment of the global status of cause of death data. *Bulletin of the World Health Organization.* 2005;83:6.
10. Byass P. Who needs cause-of-death data? *PLoS Med.* 2007;4(11):e333.
11. Byass P, Calvert C, Miiro-Nakiyingi J, Lutalo T, Michael D, Crampin A, et al. InterVA-4 as a public health tool for measuring HIV/AIDS mortality: a validation study from five African countries. *Glob Health Action.* 2013;6:22448.
12. Byass P. Usefulness of the Population Health Metrics Research Consortium gold standard verbal autopsy data for general verbal autopsy methods. *Bmc Medicine.* 2014;12.
13. Thomas LM, D'Ambruoso L, Balabanova D. Verbal autopsy in health policy and systems: a literature review. *Bmj Global Health.* 2018;3(2).
14. Leitao J, Chandramohan D, Byass P, Jakob R, Bundhamcharoen K, Choprapawon C, et al. Revising the WHO verbal autopsy instrument to facilitate routine cause-of-death monitoring. *Glob Health Action.* 2013;6:21518.
15. Nichols EK, Byass P, Chandramohan D, Clark SJ, Flaxman AD, Jakob R, et al. The WHO 2016 verbal autopsy instrument: An international standard suitable for automated analysis by InterVA, InSilicoVA, and Tariff 2.0. *Plos Medicine.* 2018;15(1).
16. Soleman N, Chandramohan D, Shibuya K. Verbal autopsy: current practices and challenges. *Bull World Health Organ.* 2006;84(3):239-45.

17. Herrera S, Enuameh Y, Adjei G, Ae-Ngibise KA, Asante KP, Sankoh O, et al. A systematic review and synthesis of the strengths and limitations of measuring malaria mortality through verbal autopsy. *Malaria Journal*. 2017;16.
18. Karat AS, Maraba N, Tlali M, Charalambous S, Chihota VN, Churchyard GJ, et al. Performance of verbal autopsy methods in estimating HIV-associated mortality among adults in South Africa. *BMJ Global Health*. 2018;3(4).
19. Kahn K, Collinson MA, Gomez-Olive FX, Mokoena O, Twine R, Mee P, et al. Profile: Agincourt health and socio-demographic surveillance system. *Int J Epidemiol*. 2012;41(4):988-1001.
20. Crampin AC, Dube A, Mboma S, Price A, Chihana M, Jahn A, et al. Profile: The Karonga Health and Demographic Surveillance System. *International Journal of Epidemiology*. 2012;41(3):676-85.
21. Murray CJL, Lopez AD, Black R, Ahuja R, Ali SM, Baqui A, et al. Population Health Metrics Research Consortium gold standard verbal autopsy validation study: design, implementation, and development of analysis datasets. *Population Health Metrics*. 2011;9.
22. Atkinson MA, Eisenbarth GS, Michels AW. Type 1 diabetes. *The Lancet*. 383(9911):69-82.
23. Thomas NJ, Jones SE, Weedon MN, Shields BM, Oram RA, Hattersley AT. Frequency and phenotype of type 1 diabetes in the first six decades of life: a cross-sectional, genetically stratified survival analysis from UK Biobank. *The Lancet Diabetes & Endocrinology*. 6(2):122-9.
24. Alemu S, Dessie A, Seid E, Bard E, Lee PT, Trimble ER, et al. Insulin-requiring diabetes in rural Ethiopia: should we reopen the case for malnutrition-related diabetes? *Diabetologia*. 2009;52(9):1842-5.
25. Marshall SL, Edidin D, Arena VC, Becker DJ, Bunker CH, Gishoma C, et al. Prevalence and incidence of clinically recognized cases of Type 1 diabetes in children and adolescents in Rwanda, Africa. *Diabet Med*. 2015;32(9):1186-92.
26. Davies J, Abimiku A, Aloba M, Mullan Z, Nugent R, Schneidman M, et al. Sustainable clinical laboratory capacity for health in Africa. *The Lancet Global health*. 2017;5(3):e248-e9.
27. Atun R, Davies JI, Gale EAM, Bärnighausen T, Beran D, Kengne AP, et al. Diabetes in sub-Saharan Africa: from clinical care to health policy. *The Lancet Diabetes & Endocrinology*. 5(8):622-67.
28. Beran D, Yudkin JS, de Courten M. Access to Care for Patients With Insulin-Requiring Diabetes in Developing Countries: Case studies of Mozambique and Zambia. *Diabetes Care*. 2005;28(9):2136-40.
29. Beran D, Ewen M, Laing R. Constraints and challenges in access to insulin: a global perspective. *The Lancet Diabetes & Endocrinology*. 2016;4(3):275-85.
30. Ogle GD, Middlehurst AC, Silink M. The IDF Life for a Child Program Index of diabetes care for children and youth. *Pediatric Diabetes*. 2015;17(5):374-84.
31. Gill CJ, Sabin L, Schmid CH. Why clinicians are natural bayesians. *British Medical Journal*. 2005;330(7499):1080-3.
32. Sirota M, Kostopoulou O, Round T, Samaranayaka S. Prevalence and Alternative Explanations Influence Cancer Diagnosis: An Experimental Study With Physicians. *Health Psychology*. 2017;36(5):477-85.
33. Hertwig R, Barron G, Weber EU, Erev I. Decisions from experience and the effect of rare events in risky choice. *Psychological Science*. 2004;15(8):534-9.



1  
2  
3 34. Hamm RM. Physicians neglect base rates, and it matters. Behavioral and Brain  
4 Sciences. 1996;19(1):25-&  
5  
6  
7  
8  
9  
10  
11  
12  
13  
14  
15  
16  
17  
18  
19  
20  
21  
22  
23  
24  
25  
26  
27  
28  
29  
30  
31  
32  
33  
34  
35  
36  
37  
38  
39  
40  
41  
42  
43  
44  
45  
46  
47  
48  
49  
50  
51  
52  
53  
54  
55  
56  
57  
58  
59  
60

For peer review only

1  
2  
3  
4  
5  
6  
7  
8  
9  
10  
11  
12  
13  
14  
15  
16  
17  
18  
19  
20  
21  
22  
23  
24  
25  
26  
27  
28  
29  
30  
31  
32  
33  
34  
35  
36  
37  
38  
39  
40  
41  
42  
43  
44  
45  
46  
47  
48  
49  
50  
51  
52  
53  
54  
55  
56  
57  
58  
59  
60

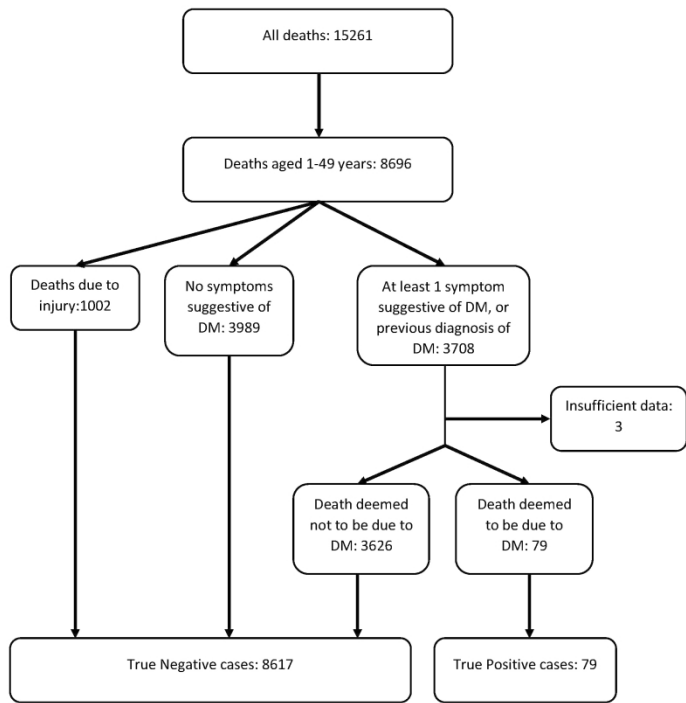

Figure 1. Study flow chart  
209x297mm (300 x 300 DPI)

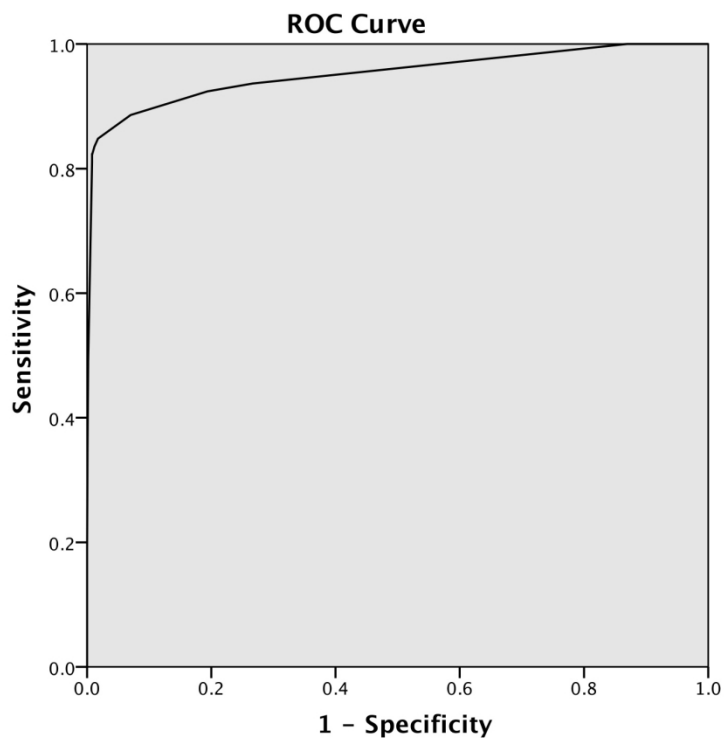

Figure 2. ROC curve for weighted score  
165x131mm (300 x 300 DPI)

## Appendix

**Table 1: Comparison between the study physician, the weighted score, and the interVA4 weighted-score applied to deaths in Agincourt**

|                                      | <50% likelihood of VAC1 being due to diabetes (n=8639) | CACC (n=58) |
|--------------------------------------|--------------------------------------------------------|-------------|
| Study negative cases total (8617)    | 8572                                                   | 48          |
| SPCC (n=77)                          | 67                                                     | 10          |
| Weighted score negative cases (8565) | 8519                                                   | 46          |
| WSCC (132)                           | 120                                                    | 12          |

CACC were defined as VA cause 1 greater than 50% probability due to type 1 diabetes

**Table 2: Univariate testing for positive and negative predictors of study-physician defined cases**

| Symptom                           | % in positive cases (n=77) | % in negative cases (n=8617) | p      |
|-----------------------------------|----------------------------|------------------------------|--------|
| Ante-mortem diagnosis of diabetes | 82.28                      | 0.87                         | <0.001 |
| Polyuria                          | 15.19                      | 2.94                         | <0.001 |
| Polydipsia                        | 49.37                      | 29.00                        | <0.001 |
| Confusion                         | 37.97                      | 17.83                        | <0.001 |
| Weight loss                       | 73.42                      | 55.47                        | 0.001  |
| Chronic abdominal pain            | 5.06                       | 1.01                         | 0.001  |
| Abdominal pain                    | 11.39                      | 2.94                         | <0.001 |
| Wasting                           | 39.24                      | 30.61                        | 0.098  |
| Acute rapid breathing             | 7.60                       | 3.92                         | 0.095  |
| TB and chronic cough              | 5.06                       | 10.90                        | 0.097  |
| Chronic diarrhoea                 | 3.8                        | 11.51                        | 0.032  |

|              |      |       |       |
|--------------|------|-------|-------|
| Injury       | 2.5  | 10.47 | 0.021 |
| Measles      | 7.59 | 2.35  | 0.002 |
| Haematuria   | 5.06 | 2.04  | 0.06  |
| Night sweats | 3.8  | 11.51 | 0.032 |

**Table 3. Multivariable testing with Inter-VA4 algorithm classification of diabetes as likely (>50%) cause of death as the dependent variable.**

|                                   | beta    | SE      | p     |
|-----------------------------------|---------|---------|-------|
| Ante-mortem diagnosis of diabetes | 3.617   | 0.485   | 0     |
| Polyuria                          | 2.7     | 0.492   | 0     |
| Polydipsia                        | 3.837   | 0.374   | 0     |
| Sunken eyes                       | -15.208 | 964.671 | 0.987 |
| Wheeze                            | -16.068 | 663.968 | 0.981 |
| Night sweats                      | -14.858 | 671.399 | 0.982 |
| wasting                           | -4.408  | 1.154   | 0     |
| Abdominal swelling                | -3.476  | 1.38    | 0.012 |
| Chronic cough                     | -2.64   | 1.083   | 0.015 |
| Chronic fever                     | -1.613  | 0.476   | 0.001 |

1  
2  
3  
4  
5  
6  
7  
8  
9  
10  
11  
12  
13  
14  
15  
16  
17  
18  
19  
20  
21  
22  
23  
24  
25  
26  
27  
28  
29  
30  
31  
32  
33  
34  
35  
36  
37  
38  
39  
40  
41  
42  
43  
44  
45  
46  
47  
48  
49  
50  
51  
52  
53  
54  
55  
56  
57  
58  
59  
60

For peer review only

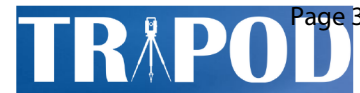

## TRIPOD Checklist: Prediction Model Development and Validation

| Section/Topic                | Item | Checklist Item | Page                                                                                                                                                                                                  |                         |
|------------------------------|------|----------------|-------------------------------------------------------------------------------------------------------------------------------------------------------------------------------------------------------|-------------------------|
| <b>Title and abstract</b>    |      |                |                                                                                                                                                                                                       |                         |
| Title                        | 1    | D;V            | Identify the study as developing and/or validating a multivariable prediction model, the target population, and the outcome to be predicted.                                                          | 1                       |
| Abstract                     | 2    | D;V            | Provide a summary of objectives, study design, setting, participants, sample size, predictors, outcome, statistical analysis, results, and conclusions.                                               | 3                       |
| <b>Introduction</b>          |      |                |                                                                                                                                                                                                       |                         |
| Background and objectives    | 3a   | D;V            | Explain the medical context (including whether diagnostic or prognostic) and rationale for developing or validating the multivariable prediction model, including references to existing models.      | 5                       |
|                              | 3b   | D;V            | Specify the objectives, including whether the study describes the development or validation of the model or both.                                                                                     | 6                       |
| <b>Methods</b>               |      |                |                                                                                                                                                                                                       |                         |
| Source of data               | 4a   | D;V            | Describe the study design or source of data (e.g., randomized trial, cohort, or registry data), separately for the development and validation data sets, if applicable.                               | 6-7                     |
|                              | 4b   | D;V            | Specify the key study dates, including start of accrual; end of accrual; and, if applicable, end of follow-up.                                                                                        | 6-7                     |
| Participants                 | 5a   | D;V            | Specify key elements of the study setting (e.g., primary care, secondary care, general population) including number and location of centres.                                                          | 6-9                     |
|                              | 5b   | D;V            | Describe eligibility criteria for participants.                                                                                                                                                       | 8                       |
|                              | 5c   | D;V            | Give details of treatments received, if relevant.                                                                                                                                                     | NA                      |
| Outcome                      | 6a   | D;V            | Clearly define the outcome that is predicted by the prediction model, including how and when assessed.                                                                                                | 6-7                     |
|                              | 6b   | D;V            | Report any actions to blind assessment of the outcome to be predicted.                                                                                                                                | NA                      |
| Predictors                   | 7a   | D;V            | Clearly define all predictors used in developing or validating the multivariable prediction model, including how and when they were measured.                                                         | 11-12; 16-17            |
|                              | 7b   | D;V            | Report any actions to blind assessment of predictors for the outcome and other predictors.                                                                                                            | NA                      |
| Sample size                  | 8    | D;V            | Explain how the study size was arrived at.                                                                                                                                                            | 6-7                     |
| Missing data                 | 9    | D;V            | Describe how missing data were handled (e.g., complete-case analysis, single imputation, multiple imputation) with details of any imputation method.                                                  | NA                      |
| Statistical analysis methods | 10a  | D              | Describe how predictors were handled in the analyses.                                                                                                                                                 | 11-12; 16-17            |
|                              | 10b  | D              | Specify type of model, all model-building procedures (including any predictor selection), and method for internal validation.                                                                         | 11-12                   |
|                              | 10c  | V              | For validation, describe how the predictions were calculated.                                                                                                                                         | 12-13                   |
|                              | 10d  | D;V            | Specify all measures used to assess model performance and, if relevant, to compare multiple models.                                                                                                   | 9                       |
|                              | 10e  | V              | Describe any model updating (e.g., recalibration) arising from the validation, if done.                                                                                                               | NA                      |
| Risk groups                  | 11   | D;V            | Provide details on how risk groups were created, if done.                                                                                                                                             | NA                      |
| Development vs. validation   | 12   | V              | For validation, identify any differences from the development data in setting, eligibility criteria, outcome, and predictors.                                                                         | 9                       |
| <b>Results</b>               |      |                |                                                                                                                                                                                                       |                         |
| Participants                 | 13a  | D;V            | Describe the flow of participants through the study, including the number of participants with and without the outcome and, if applicable, a summary of the follow-up time. A diagram may be helpful. | Figure 1                |
|                              | 13b  | D;V            | Describe the characteristics of the participants (basic demographics, clinical features, available predictors), including the number of participants with missing data for predictors and outcome.    | 7                       |
|                              | 13c  | V              | For validation, show a comparison with the development data of the distribution of important variables (demographics, predictors and outcome).                                                        | Table 4                 |
| Model development            | 14a  | D              | Specify the number of participants and outcome events in each analysis.                                                                                                                               | Table 4, page 10        |
|                              | 14b  | D              | If done, report the unadjusted association between each candidate predictor and outcome.                                                                                                              | NA                      |
| Model specification          | 15a  | D              | Present the full prediction model to allow predictions for individuals (i.e., all regression coefficients, and model intercept or baseline survival at a given time point).                           | Page 12, tables 2 and 3 |
|                              | 15b  | D              | Explain how to use the prediction model.                                                                                                                                                              | Table 2                 |
| Model performance            | 16   | D;V            | Report performance measures (with CIs) for the prediction model.                                                                                                                                      | Figure 2, table 3       |
| Model-updating               | 17   | V              | If done, report the results from any model updating (i.e., model specification, model performance).                                                                                                   | NA                      |
| <b>Discussion</b>            |      |                |                                                                                                                                                                                                       |                         |
| Limitations                  | 18   | D;V            | Discuss any limitations of the study (such as nonrepresentative sample, few events per predictor, missing data).                                                                                      | Page 15                 |
| Interpretation               | 19a  | V              | For validation, discuss the results with reference to performance in the development data, and any other validation data.                                                                             | Page 14/15              |
|                              | 19b  | D;V            | Give an overall interpretation of the results, considering objectives, limitations, results from similar studies, and other relevant evidence.                                                        | Page 14/15              |
| Implications                 | 20   | D;V            | Discuss the potential clinical use of the model and implications for future research.                                                                                                                 | Page 15                 |

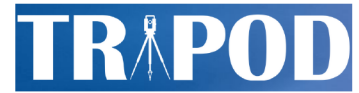

## TRIPOD Checklist: Prediction Model Development and Validation

| Other information         |    |     |                                                                                                                               |        |
|---------------------------|----|-----|-------------------------------------------------------------------------------------------------------------------------------|--------|
| Supplementary information | 21 | D;V | Provide information about the availability of supplementary resources, such as study protocol, Web calculator, and data sets. | NA     |
| Funding                   | 22 | D;V | Give the source of funding and the role of the funders for the present study.                                                 | Page 9 |

\*Items relevant only to the development of a prediction model are denoted by D, items relating solely to a validation of a prediction model are denoted by V, and items relating to both are denoted D;V. We recommend using the TRIPOD Checklist in conjunction with the TRIPOD Explanation and Elaboration document.
