# Supplementary material for: Ability of verbal autopsy data to detect deaths due to uncontrolled hyperglycaemia: testing existing methods and development and validation of a novel weighted score
Source: PubMed Central journal article supplement — BMJ Open. 2019 Oct 18;9(10):e026331. doi: 10.1136/bmjopen-2018-026331 (PMC6803086; doi:10.1136/bmjopen-2018-026331), 2019-10-18
Supplement: bmjopen-2018-026331supp001.pdf [file bmjopen-2018-026331supp001.pdf]

## Appendix

**Table 1: Comparison between the study physician, the weighted score, and the interVA4 weighted-score applied to deaths in Agincourt**

|                                      | <50% likelihood of VAC1 being due to diabetes (n=8639) | CACC (n=58) |
|--------------------------------------|--------------------------------------------------------|-------------|
| Study negative cases total (8617)    | 8572                                                   | 48          |
| SPCC (n=77)                          | 67                                                     | 10          |
| Weighted score negative cases (8565) | 8519                                                   | 46          |
| WSCC (132)                           | 120                                                    | 12          |

CACC were defined as VA cause 1 greater than 50% probability due to type 1 diabetes

**Table 2: Univariate testing for positive and negative predictors of study-physician defined cases**

| Symptom                           | % in positive cases (n=77) | % in negative cases (n=8617) | p      |
|-----------------------------------|----------------------------|------------------------------|--------|
| Ante-mortem diagnosis of diabetes | 82.28                      | 0.87                         | <0.001 |
| Polyuria                          | 15.19                      | 2.94                         | <0.001 |
| Polydipsia                        | 49.37                      | 29.00                        | <0.001 |
| Confusion                         | 37.97                      | 17.83                        | <0.001 |
| Weight loss                       | 73.42                      | 55.47                        | 0.001  |
| Chronic abdominal pain            | 5.06                       | 1.01                         | 0.001  |
| Abdominal pain                    | 11.39                      | 2.94                         | <0.001 |
| Wasting                           | 39.24                      | 30.61                        | 0.098  |
| Acute rapid breathing             | 7.60                       | 3.92                         | 0.095  |
| TB and chronic cough              | 5.06                       | 10.90                        | 0.097  |
| Chronic diarrhoea                 | 3.8                        | 11.51                        | 0.032  |

|              |      |       |       |
|--------------|------|-------|-------|
| Injury       | 2.5  | 10.47 | 0.021 |
| Measles      | 7.59 | 2.35  | 0.002 |
| Haematuria   | 5.06 | 2.04  | 0.06  |
| Night sweats | 3.8  | 11.51 | 0.032 |

**Table 3. Multivariable testing with Inter-VA4 algorithm classification of diabetes as likely (>50%) cause of death as the dependent variable.**

|                                   | beta    | SE      | p     |
|-----------------------------------|---------|---------|-------|
| Ante-mortem diagnosis of diabetes | 3.617   | 0.485   | 0     |
| Polyuria                          | 2.7     | 0.492   | 0     |
| Polydipsia                        | 3.837   | 0.374   | 0     |
| Sunken eyes                       | -15.208 | 964.671 | 0.987 |
| Wheeze                            | -16.068 | 663.968 | 0.981 |
| Night sweats                      | -14.858 | 671.399 | 0.982 |
| wasting                           | -4.408  | 1.154   | 0     |
| Abdominal swelling                | -3.476  | 1.38    | 0.012 |
| Chronic cough                     | -2.64   | 1.083   | 0.015 |
| Chronic fever                     | -1.613  | 0.476   | 0.001 |
